# Supplementary material for: Genomic insights of body plan transitions from bilateral to pentameral symmetry in Echinoderms
Source: PubMed Central journal article supplement (PMC7351957; doi:10.1038/s42003-020-1091-1), 2020-07-10
Supplement: 42003_2020_1091_MOESM1_ESM.pdf [file 42003_2020_1091_MOESM1_ESM.pdf]

## Supplementary Figures

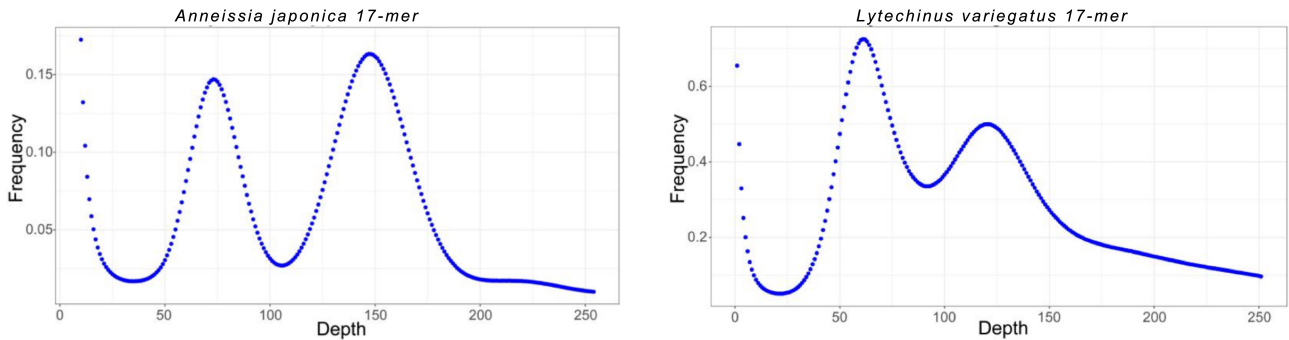

**Supplementary Figure 1 Estimation of genome size by 17-mer analysis.**

Kmer analysis has been done using similar method previously described<sup>64</sup>. The homozygous peak (around depth = 150 for *A. japonica* and 120 for *L. variegatus*) of the 17-mer frequency (M) is known to correlate with the real sequencing depth (N), read length (L), and kmer length (K), and their relations can be expressed in an experienced formula:  $M = N * (L - K + 1) / L$ . Estimated genome sizes of the feather star and green sea urchin were ~ 553 Mb and ~ 952 Mb respectively.

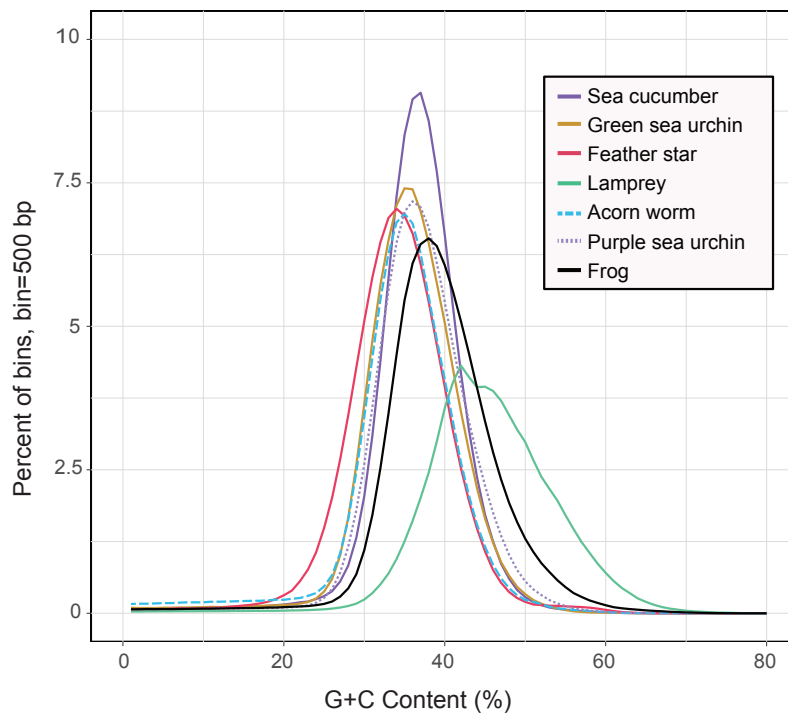

**Supplementary Figure 2 GC content in genomes.**

The x-axis represents GC content and the y-axis represent the proportion of the windows number divided by the total windows. The GC content was calculated using a 500bp sliding window (250 bp stepwise). Note that Feather star genome showed slightly higher G + C content compared to other echinoderms.

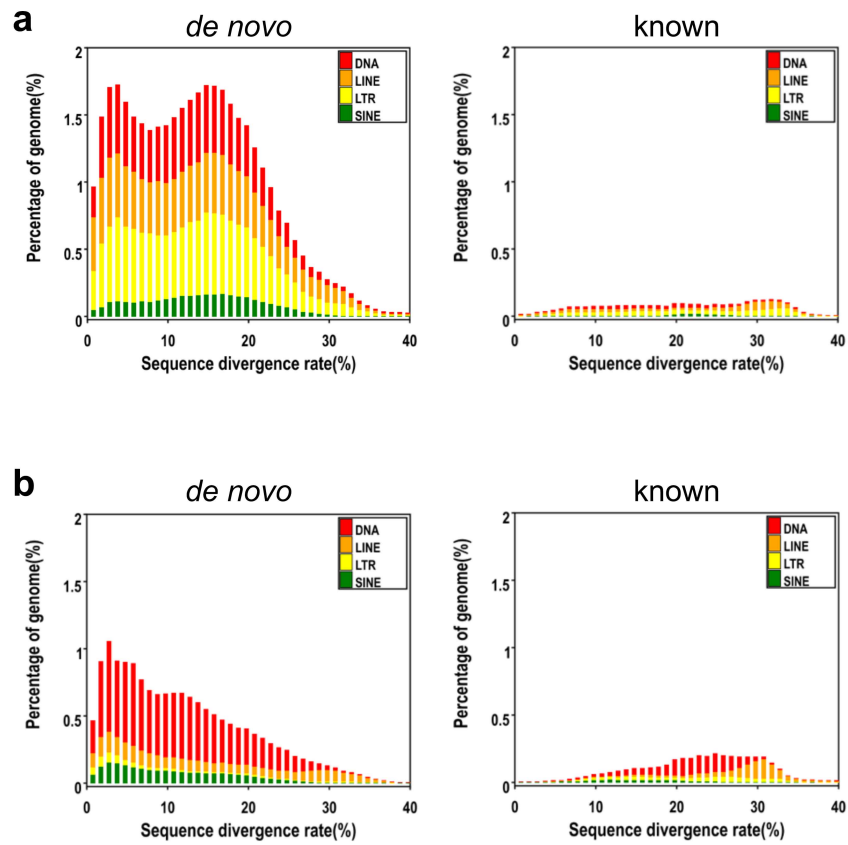

**Supplementary Figure 3** The statistics of repetitive sequences.

Repetitive sequences (*de novo* predicted and known sequences) in the genomes of the feather star genome (a) and the green sea urchin (b) are shown. LINE: Long interspersed elements, LTR: Long terminal repeat, SINE: Short interspersed elements.

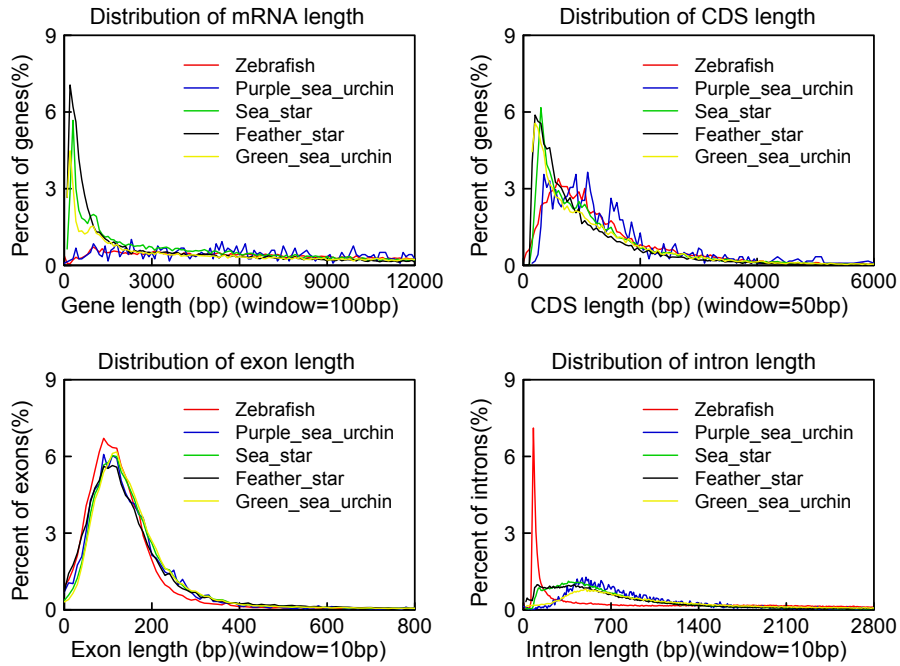

**Supplementary Figure 4 Basic statistics of predicted genes for feather star and green sea urchin.**

Features of predicted (by Evidence Modeler, EVM) gene sets of zebrafish, purple sea urchin, sea star, feather star, and green sea urchin are illustrated. The x-axis indicates length (bp) of each genetic feature and the y-axis indicates the percentage of genes that have the corresponding length.

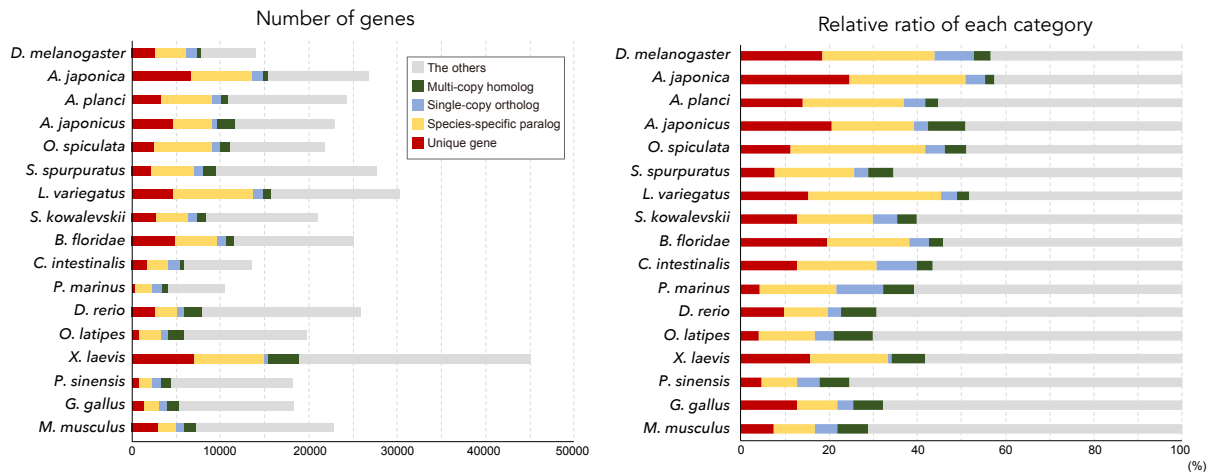

**Supplementary Figure 5 The statistics of ortholog genes among 17 species.**

Left panel: identified number of genes in each genome were categorized by their copy number of paralogs and homologs in the other species. Right panel: Relative ratio of categorized genes. *Unique gene* (species-specific, single copy gene): species-specific gene (no homologs in other species) without paralogs; *Species-specific paralogs*: species-specific genes (no homologs in other species) with paralogs in each species; *Single-copy ortholog*: gene that have only one copy in each species but have homologs in other species; *Multi-copy homolog*: gene that have more than one copy in each species, together with homologs in other species; *Other orthologs*: orthologs that do not belong to any type of the above orthologs/genes. The x-axis represents species used in this analysis, and y-axis represents the number of orthologs/genes in each category.

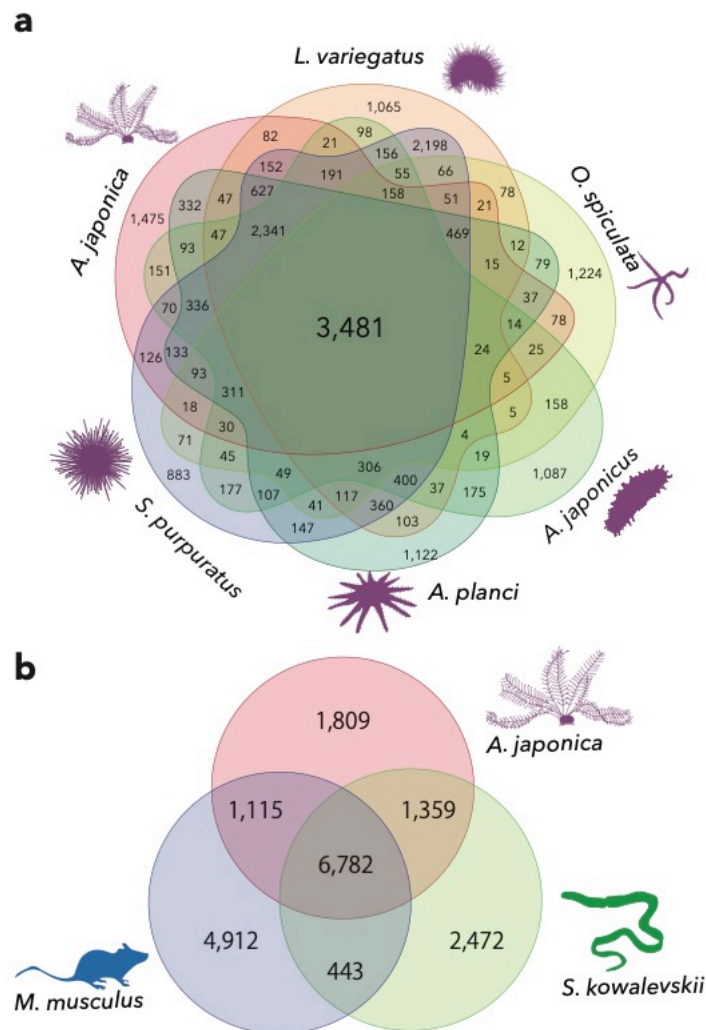

**Supplementary Figure 6 Gene families shared among echinoderms, chordates and hemichordate**

Conserved protein coding genes analyzed by analyzed by orthomcl<sup>54</sup>. **(a)** conserved protein coding genes among 5 echinoderm species, and **(b)** those among mouse, acon worm and feather star. Venn diagrams were drawn by R package “venn”. Note that numbers indicate gene families (ortholog groups) defined by orthomcl, and do not indicate the actual numbers of coding genes.

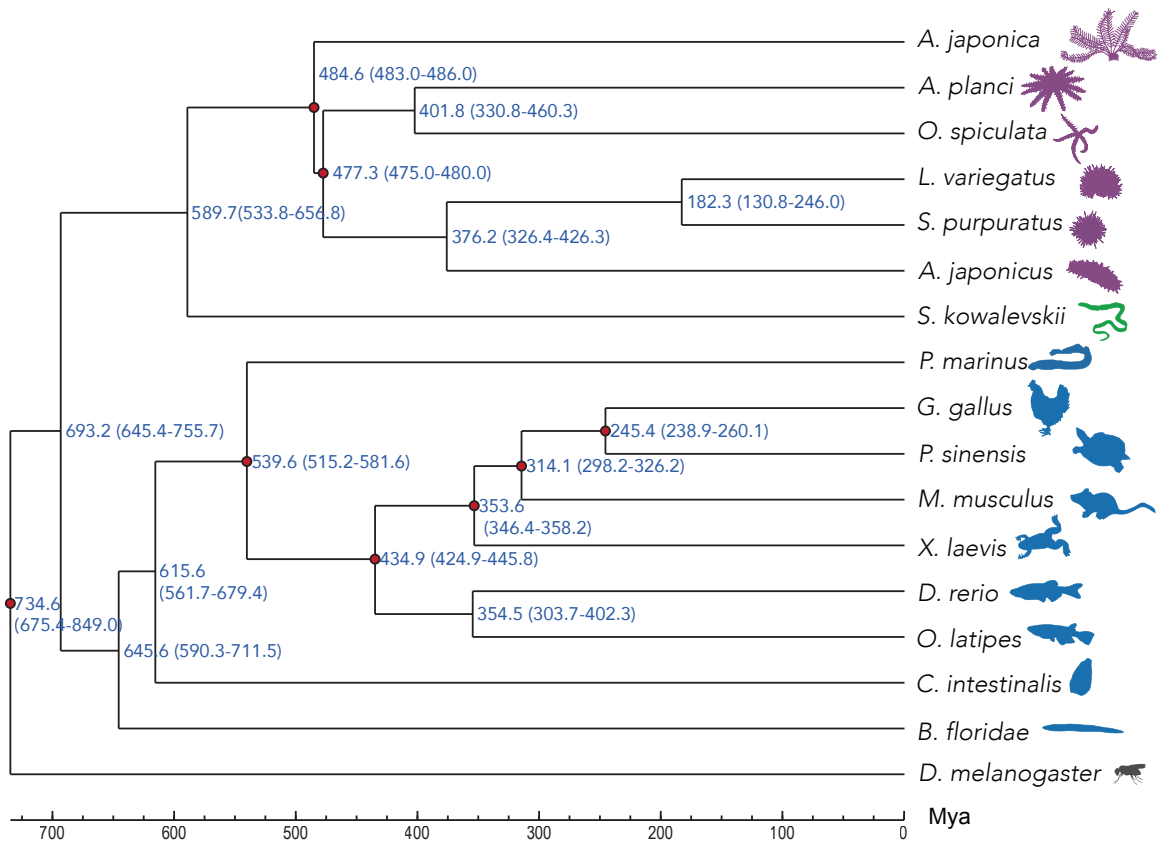

### Supplementary Figure 7 Phylogeny and estimated divergence time

The tree was constructed using the 4 fold degenerate codon site of 1196 one-to-one ortholog genes. Divergence time was estimated by MCMCtree software with calibration points indicated in red points. Numbers in blue represent bootstrap values of each node.

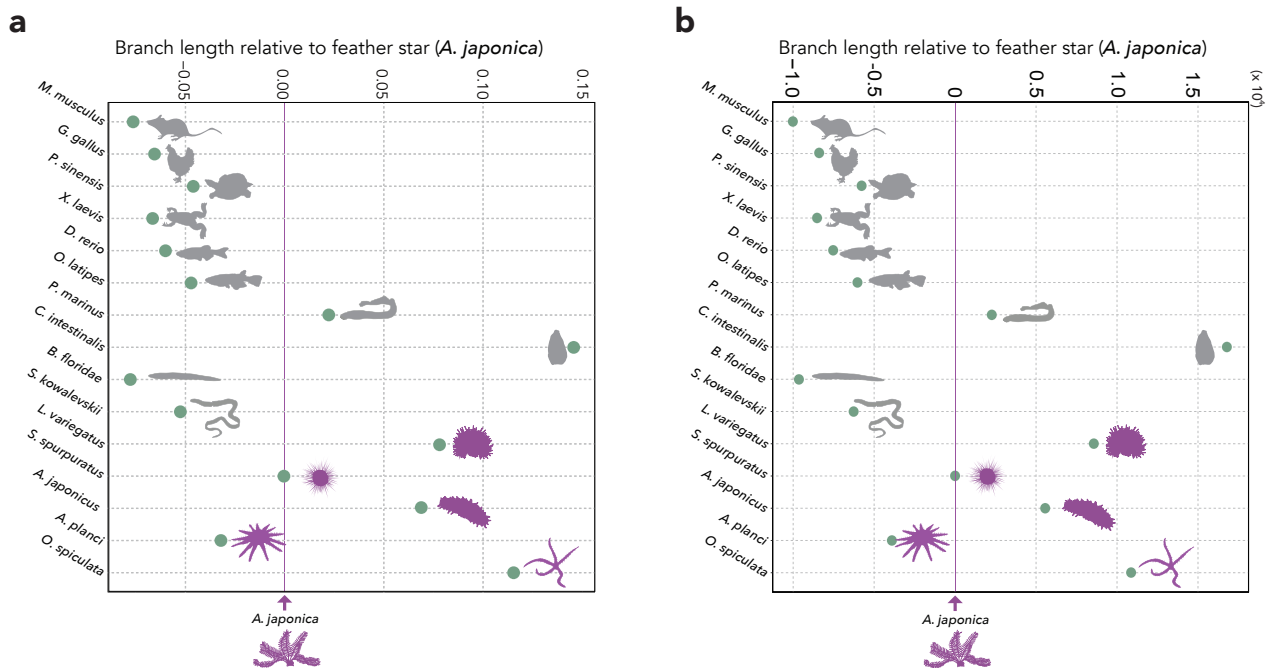

### Supplementary Figure 8 Relative evolutionary rate of protein sequences

Protein sequences of 1196 one-to-one ortholog genes (identified by RBBH) were analyzed by LINTRE software (a) and MEGA with Tajima's Relative Ratio Test (b). Y axis represents relative branch length of protein sequences (compared to that of *A. japonica* from the common ancestor of echinoderms/hemichordates/chordates). While *C. intestinalis* shows the longest branch length, those of echinoderm species were relatively longer than those of most vertebrates.

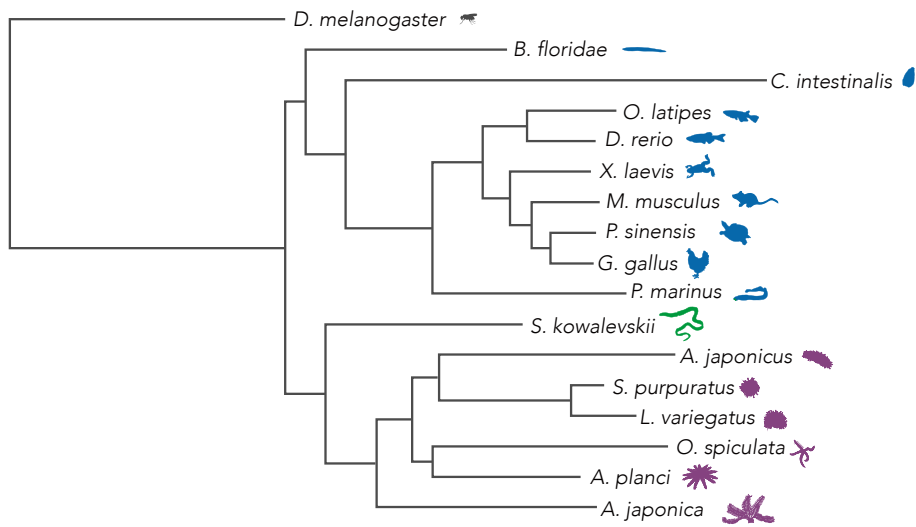

**Supplementary Figure 9 Relative evolutionary rate of protein sequences analyzed by APE package.**  
 The data used in this analysis was produced with 1,196 one-to-one genes (identified by RBBH) and analyzed by APE R-package.

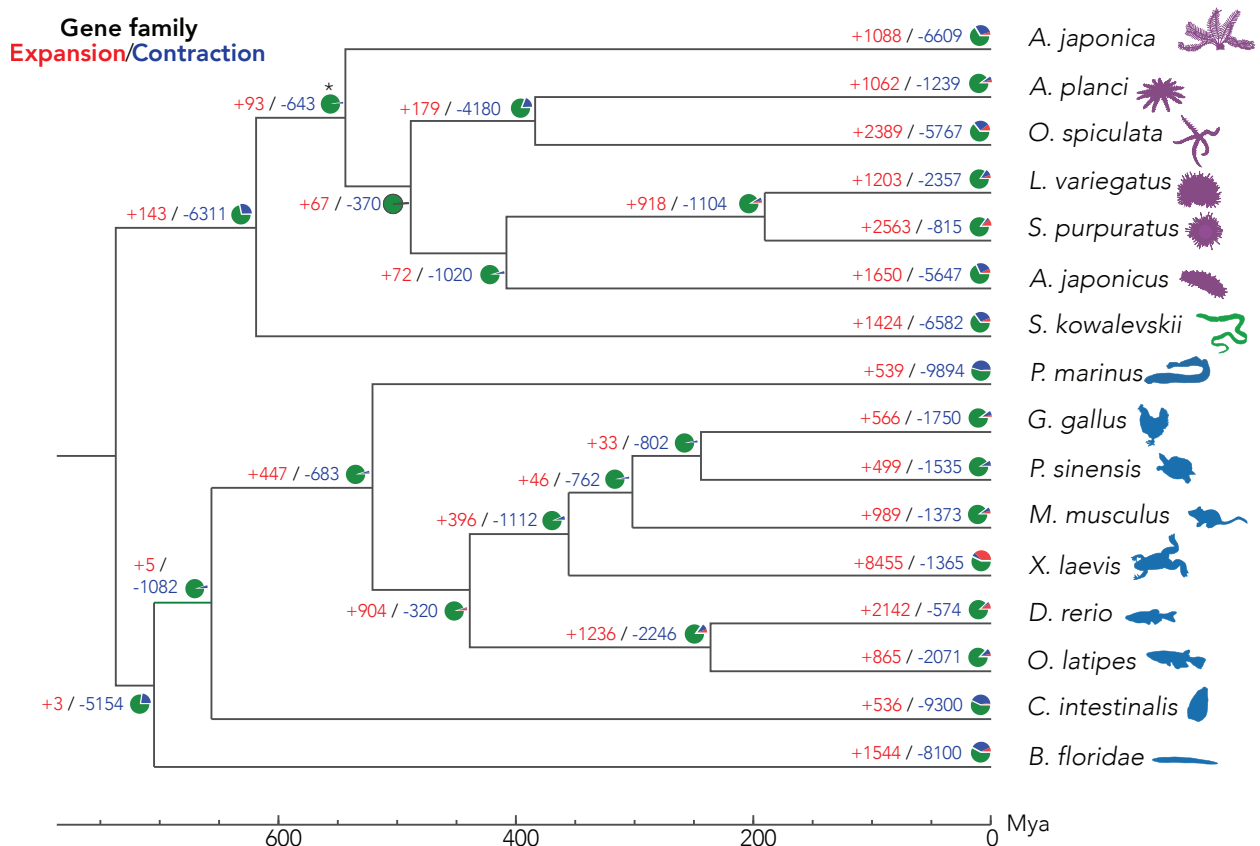

**Supplementary Figure 10 Numbers of expanded and contracted gene families**  
 Numbers in red represent numbers of expanded gene families (ortholog groups) defined by orthomcl, and numbers in blue represent those contracted gene families (ortholog groups). The pie figures on each node were drawn according to the ratio of expanded and contracted families. See Supplementary Figure 11 for GO analyses of gene families expanded / contracted in the common ancestor of echinoderms (marked with \* in the figure).

**a GO term enrichment of Echinoderm-contracted genes**

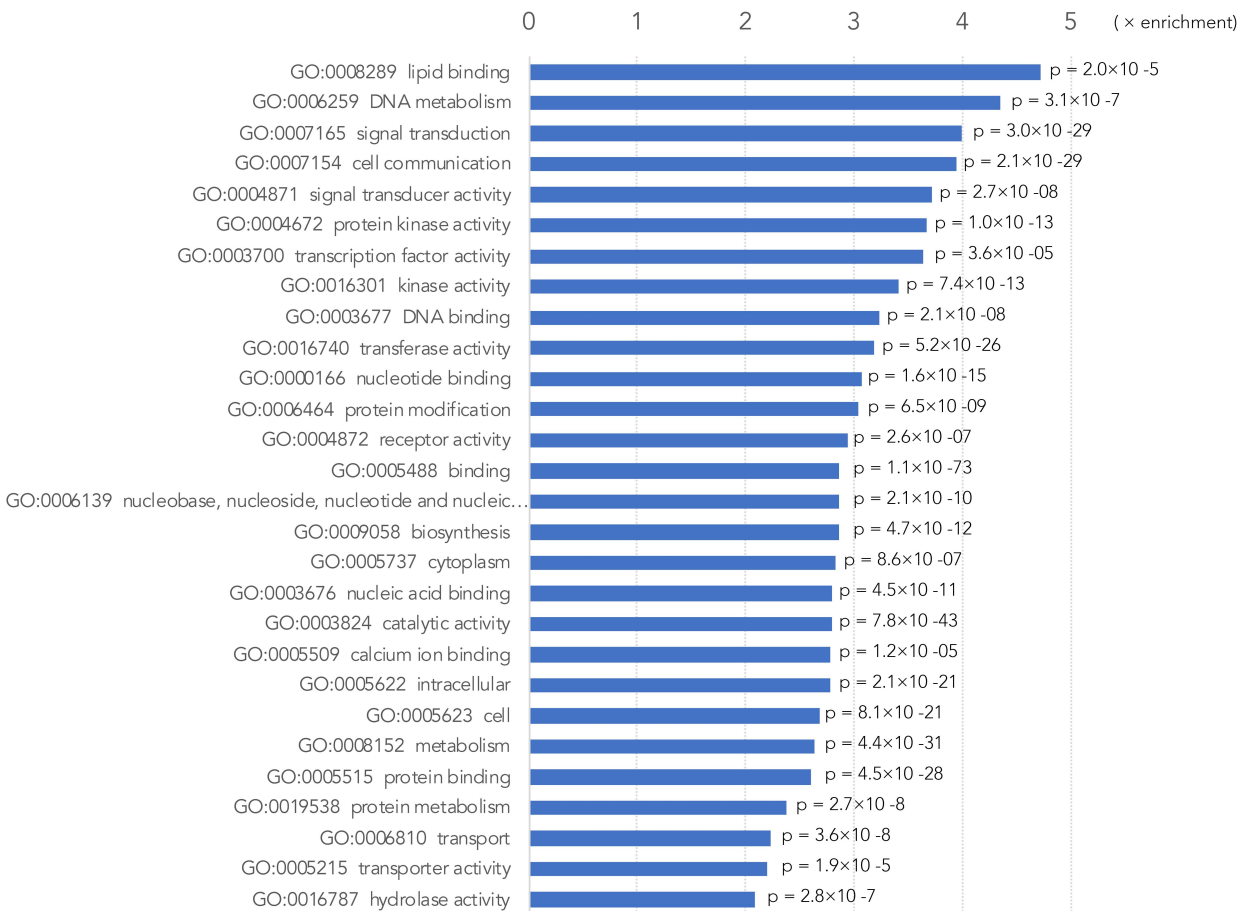

**b GO term enrichment of Echinoderm-expanded genes**

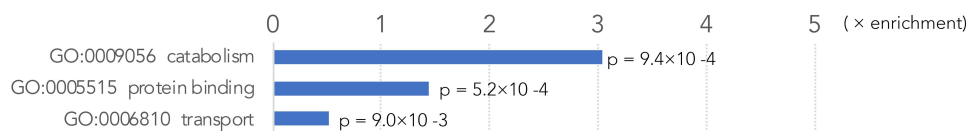

**Supplementary Figure 11 GO enrichment analysis of genes expanded/contracted in echinoderm lineage**

Genes predicted to be contracted (a) and expanded (b) in the hypothetical common ancestor of echinoderms (see “\*” position in Supplementary Figure 10 for the gene set analyzed in this figure) were analyzed for their GO term enrichment. Amphioxus (*B. floridae*) gene counterparts of the echinoderm contracted/expanded genes were first identified, and further analyzed for their GO slim term enrichment against the amphioxus genomic background using CateGORizer (<https://www.animalgenome.org/tools/catego/>). Enrichment represents relative ratio of the GO terms of echinoderm-contracted/expanded genes against the genomic background. Only statistically significant results are shown here.

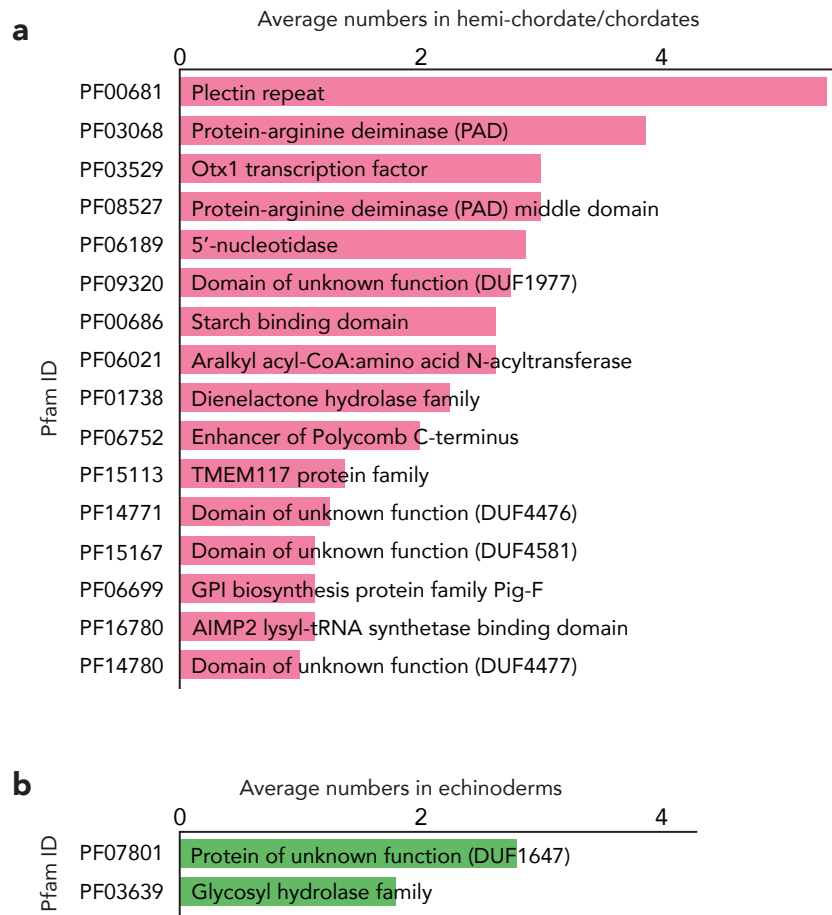

### Supplementary Figure 12 Domains lost / specifically found in echinoderms

Pfam defined protein domains lost (**a**) or detected only in echinoderms (**b**) are shown. Genomes of five echinoderm species (*A. japonica*, *O. spiculata*, *L. variegatus*, *A. planci*, *A. japonicus*), and 8 other species (*S. kowalevskii*, *B. floridae*, *D. rerio*, *G. gallus*, *A. mississippiensis*, *M. musculus*, *P. marinus*, *X. laevis*) were used for this analysis. **a**. Protein domains not detected in any of the echinoderm species, but were detected in the hemichordates or chordate species were defined as lost. **b**. Protein domains detected only in the echinoderms.



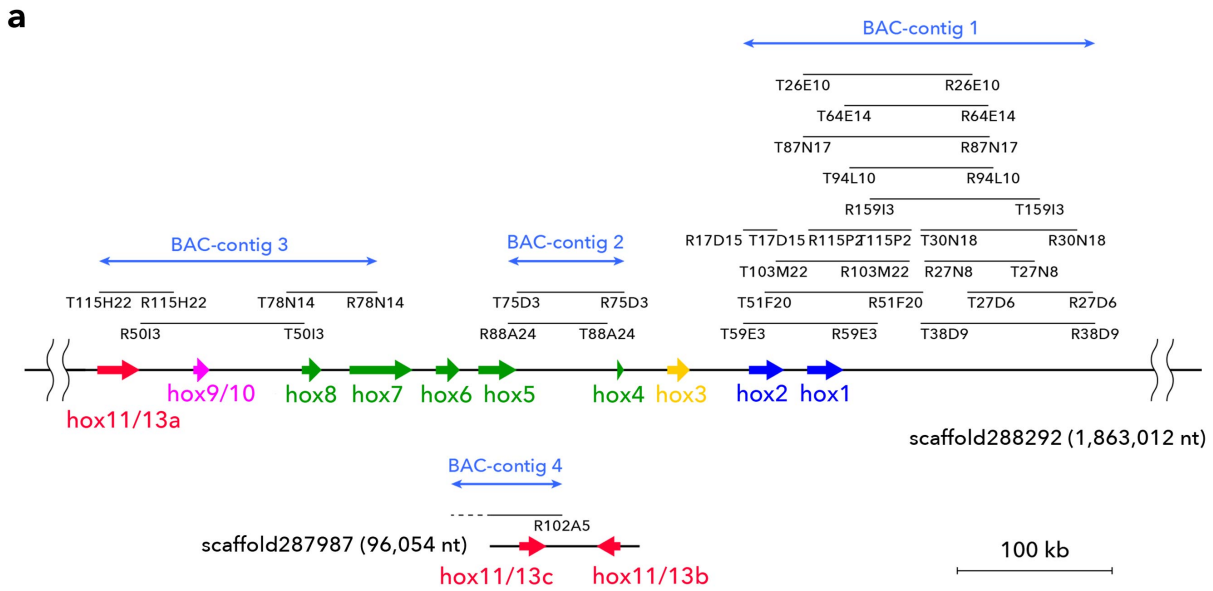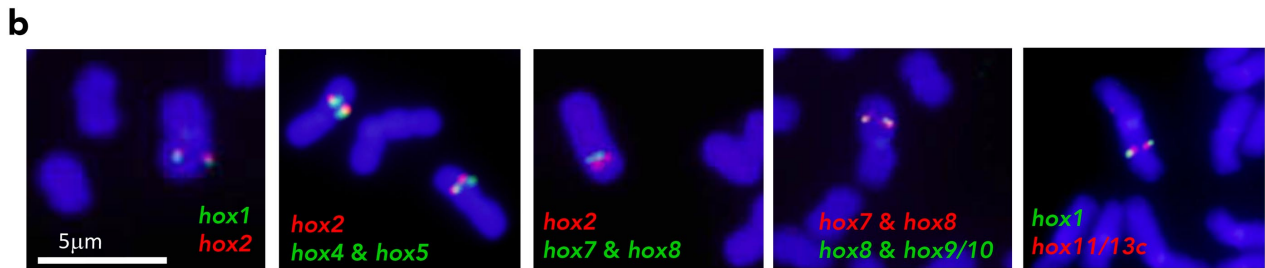

**Supplementary Figure 13 Mapping of Hox genes onto scaffolds and chromosomes in feather star**

**a.** Chromosome walking using 23 BAC clones yielded four BAC-contigs which contained *hox1* and *hox2* [1], *hox4* and *hox5* [2], *hox7*, *hox8*, *hox9/10* and *hox11/13a*; [3] and *hox11/13c* [4], respectively. The 4 contigs were turned out to be included by 2 scaffolds, 288292 and 287987. **b.** Two color-chromosomal FISH. Metaphase chromosome spreads were prepared from feather star embryos and hybridized with two probes labeled with digoxigenin (red) or biotin (green) for genes indicated at the bottom of each panel. Chromosomes were stained with DAPI. Red and green spots indicate signals for the gene of the same color code. FISH analysis revealed that all of the 12 Hox genes contained in the 2 scaffolds are localized closely together on the chromosome.

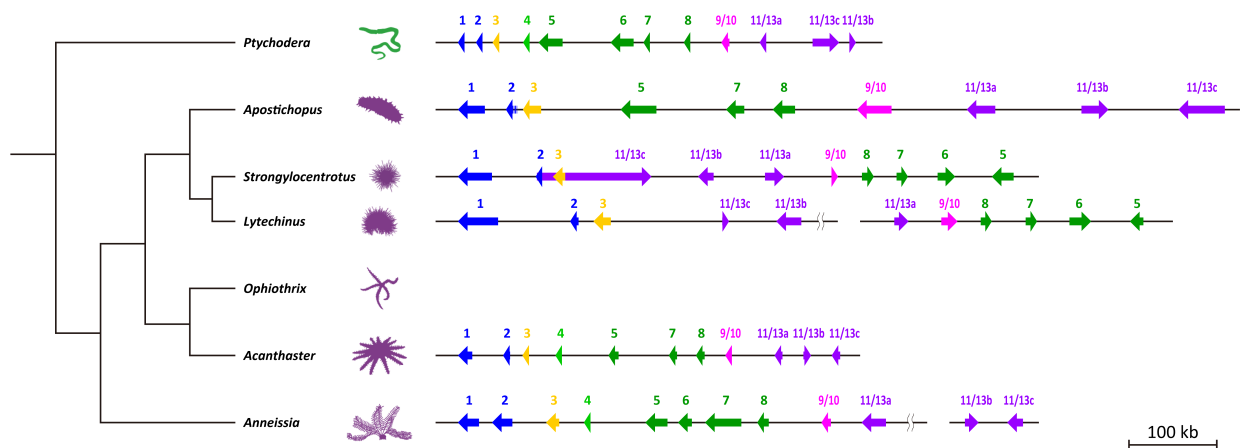

### Supplementary Figure 14 Genomic organization of ambulacrarian Hox gene clusters

The ambulacrarian phylogenetic tree based on the present study and genomic organization of ambulacrarian Hox gene clusters are indicated. Arrows and solid lines represent Hox gene CDSs and scaffolds, respectively. As regards *A. japonicus hox2*, only partial CDS was identified, hence represented by the dashed arrow. In *L. variegatus*, 11 Hox genes were located on 2 scaffolds. Similarly, in *A. japonica*, 10 genes (*hox1* through *hox11/13a*) and 2 genes (*hox11/13b* and *hox11/13c*) were on 2 scaffolds, both of which were, however, on the same chromosome according to the FISH analysis (see Supplementary Fig. 13). Note the (nucleotide) length from *hox11/13b* of *L. variegatus* and *hox11/13a* of *A. japonica* to the end of respective scaffolds was more than 100 kb. Previous studies were referred for the Hox cluster structures of *P. flava*<sup>9</sup>, *A. japonicus*<sup>33</sup>, *S. purpuratus*<sup>7</sup> and *A. planci*<sup>8</sup>.

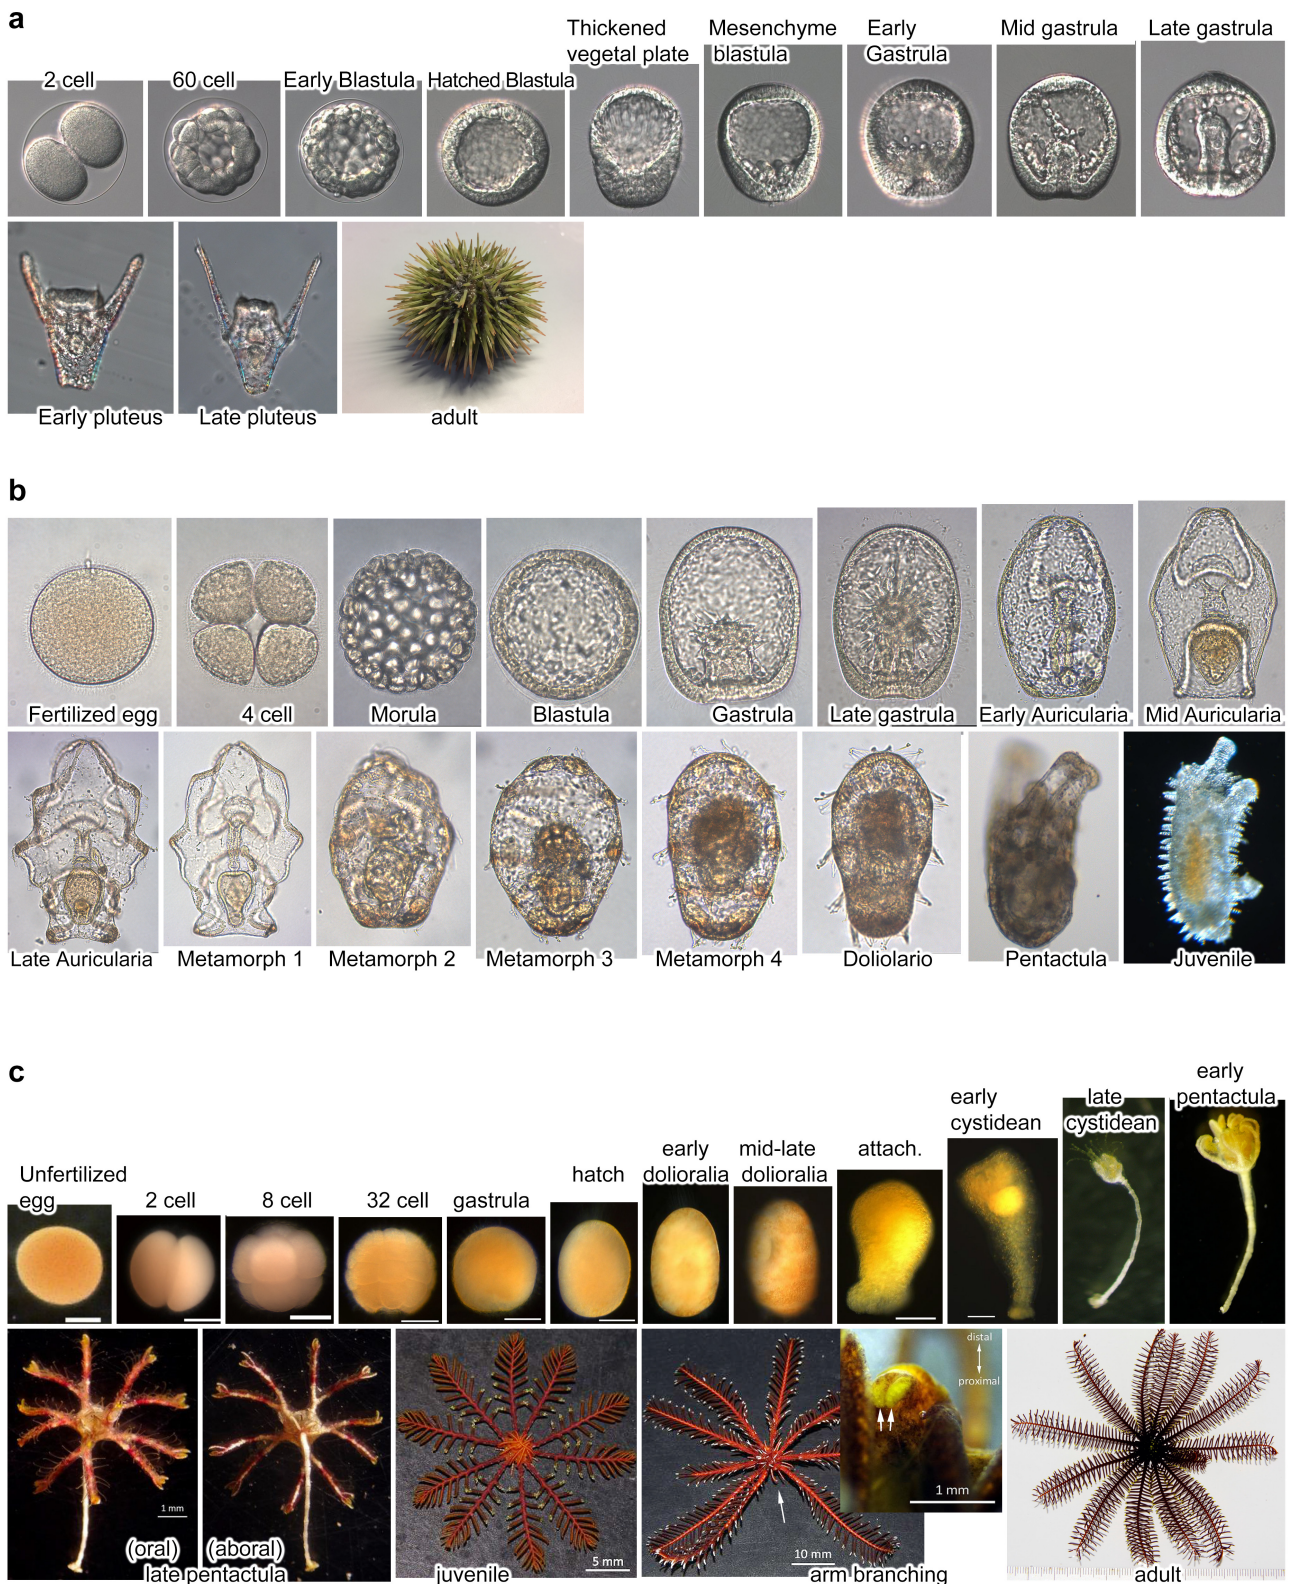

**Supplementary Figure 15 Developmental stages of green sea urchin, sea cucumber and feather star**  
 Representative images of collected echinoderm embryos for (a) green sea urchin (*L. variegatus*), (b) sea cucumber (*A. japonicus*), and (c) feather star (*Anneissia japonica*). (a) Images were modified from manuscript under preparation (Hogan *et al.*<sup>38</sup>). Images of the remaining stages; 7 weeks post fertilization (wpf), 8 wpf, 8 wpf Larva (without rudiment), 8 wpf rudiment, 8.1wpf, 1 day post-metamorphosis, 9wpf (1 week post-metamorphosis), are not shown here. Adult stage here corresponds to 20wpf. (b) Images were modified from previously published work<sup>23</sup>. (c) An arrow in the arm branching stage indicates the position of the branching arm (magnified image on it's top right). Arrows in the magnified image indicate the branching arm buds. Scale bars in unfertilized egg to early cystidean indicate 100  $\mu$ m.

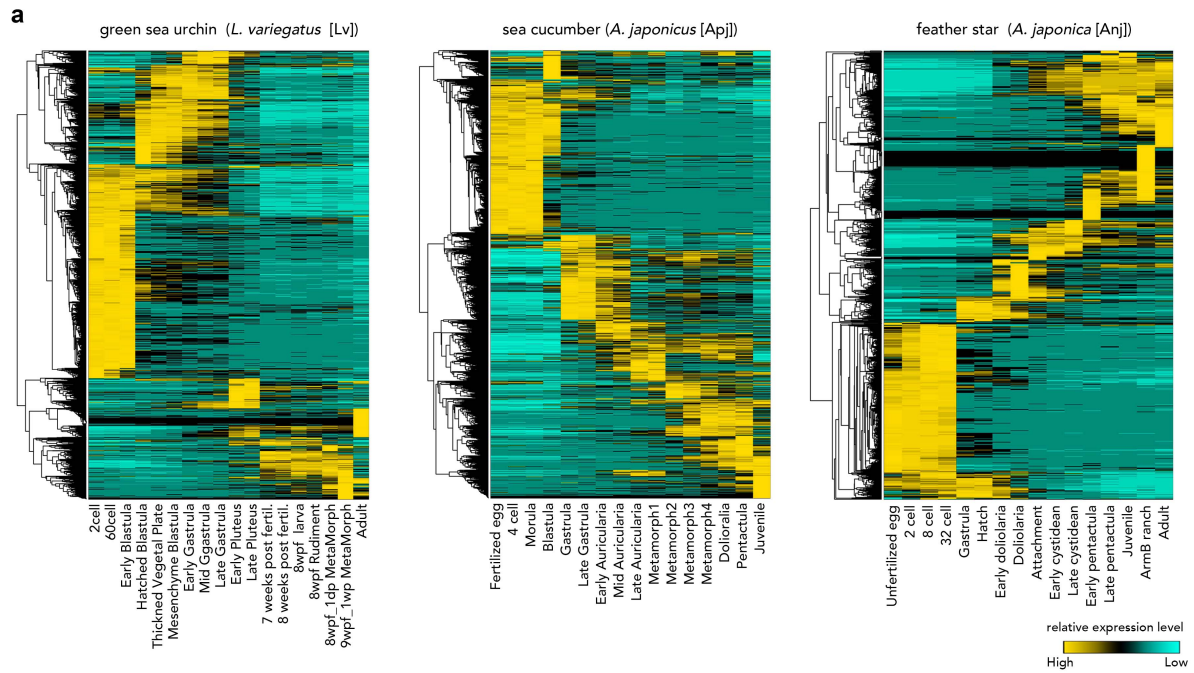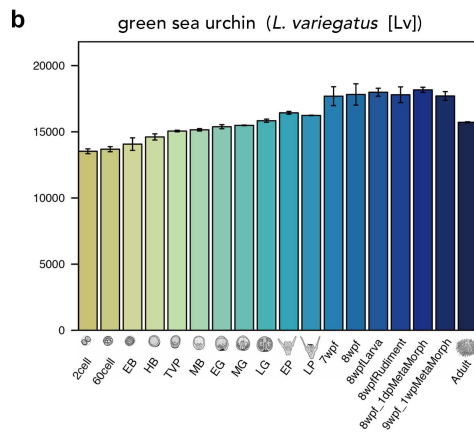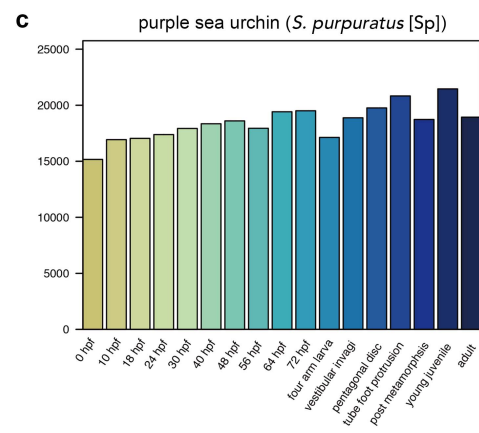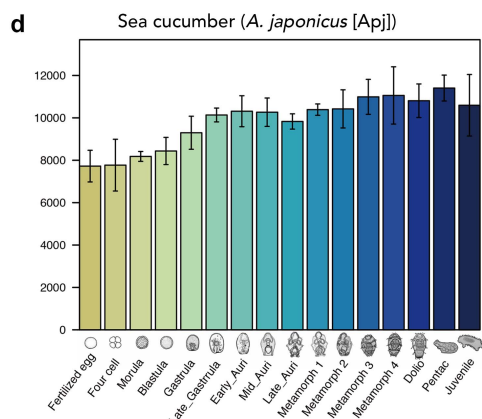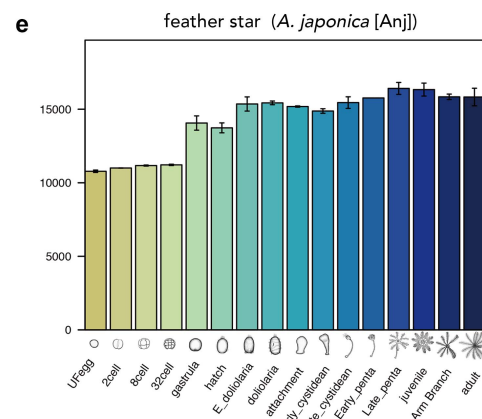

### Supplementary Figure 16 Overview of gene expression patterns in echinoderm species

**a.** Gene expression patterns estimated from RNAseq data for each echinoderm species. For each gene, expression levels (TPM values) were z-score normalized along developmental stages. **(b-e).** Numbers of genes detected during echinoderm embryogenesis. Increasing number of coding genes detected during embryogenesis of *Lytechinus variegatus* **(b)**, *Strongylocentrotus purpuratus* **(c)**, *Apostichopus japonicus* **(d)**, and *Anneissia japonica* **(e)**. TPM higher than 1 was utilized as detection threshold, and expression levels of 10M-mapped data were used for this analysis. X-axis indicate numbers of genes detected at the stages indicated in Y-axis, and error bars indicate S.D. of numbers of detected coding genes in the biological replicate samples. Results for *S. purpuratus* do not have error bars, as the dataset (PRJNA81157) did not contain biological replicates for each stage.

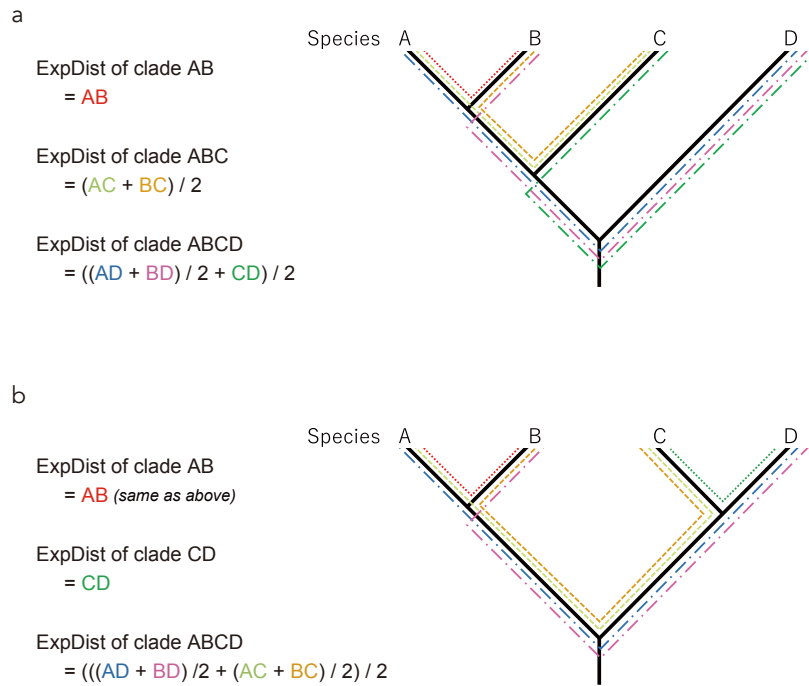

### Supplementary Figure 17 Calculation of expDists for estimating conserved stages

In calculating expression Distance (expDist) of species in a single clade (as in Fig.2), phylogenetic relationship was taken into consideration to avoid unwanted bias arising from simple pair-wise comparisons of species<sup>62</sup>. **a.** For example, expDists in clade (A,B)C)D) was calculated as  $(AD + BD)/2 + CD)/2$  and did not include species-pair such as BC or AC, as these do not reflect phylogenetic scale of interest. This calculation slightly differs from the previously reported method  $[(AD)/3 + (BD)/3 + (CD)/3$  for the above case], as the previous method could be biased by distances among the species in a sub-clade (A,B)C). **b.** Hypothetical clade ((A,B),(C,D)) could be calculated as  $(((AD + BD)/2 + (AC + BC)/2)/2$ . However, this kind of phylogenetic relationship was not found in the echinoderm species we analyzed in this study, and thus was not utilized in estimating conserved stages of echinoderms.

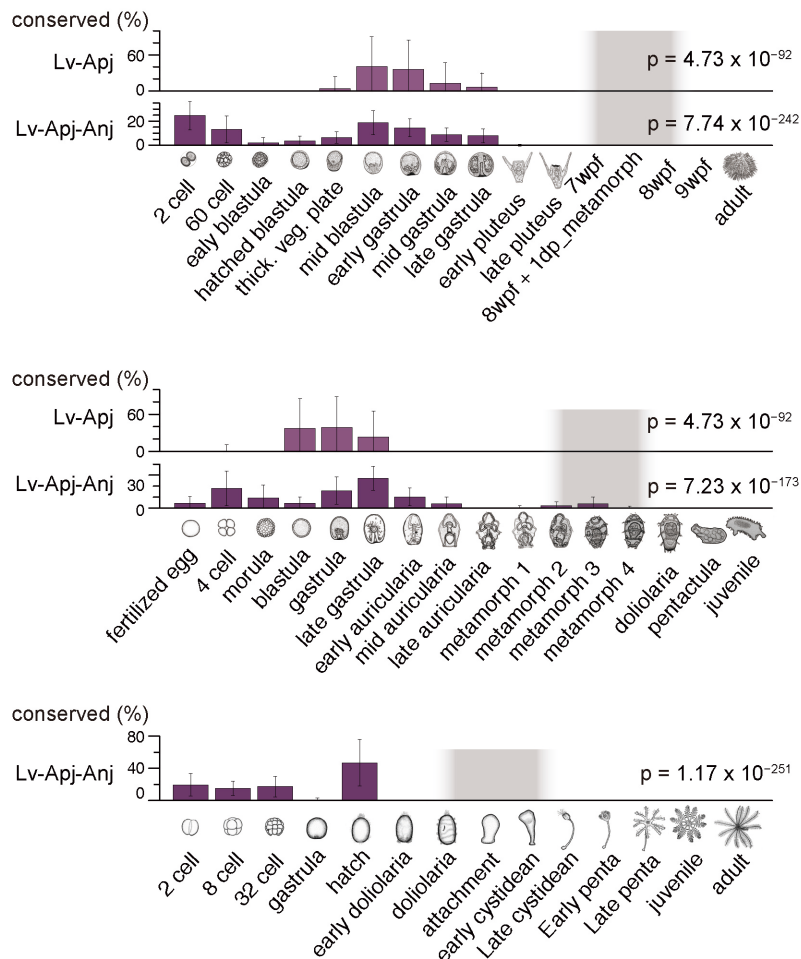

**Supplementary Figure 18 Estimation of most conserved developmental stages in echinoderms without purple sea urchin.**

Vertical axis represents percentages of stage being included in the most (top 1%) conserved stage-combinations<sup>13</sup> (Ptop). Changes of the conservation score (Ptop scores, %) were significant among stages (Friedman test). Error bars represent S.D. of Ptop values. Similar stages as in Figure 2 were found to be conserved for species without purple sea urchin (obtained from public database [PRJNA81157] sequenced by Tu Q *et al*<sup>21,22</sup>). In each species, developmental phase when pentamerous body plan establishment begins were colored in gray.

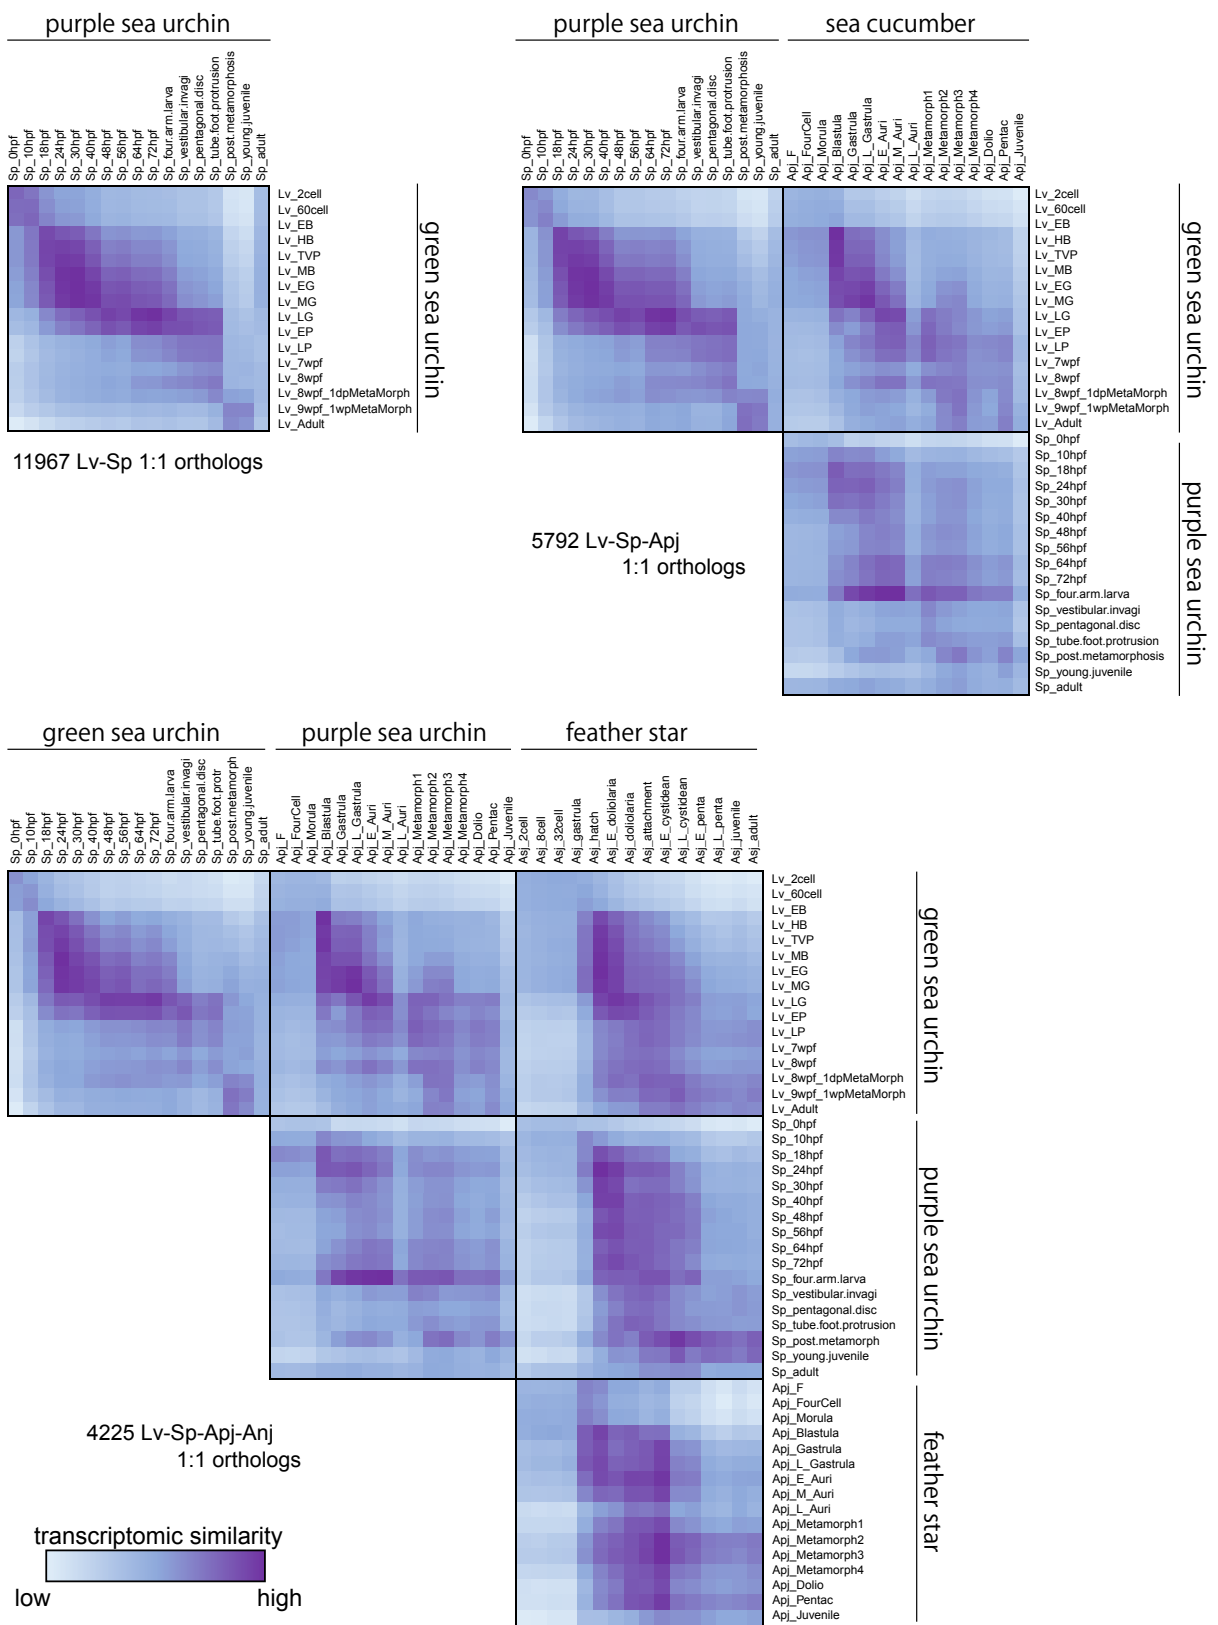

### Supplementary Figure 19 Pair-wise comparisons of echinoderm transcriptome based on 1:1 orthologs

Whole embryonic transcriptome similarities were calculated for all the combinations of echinoderm stages in pair-wise manner. Expression levels (TPM) of 1:1 orthologs (defined by reciprocal best blast hits, RBBH) for Lv-Sp (11967 orthologs), Lv-Sp-Apj (5792 orthologs), and Lv-Sp-Apj-Anj (4225 orthologs) were used to calculate transcriptomic dissimilarities ( $1 - \text{Spearman correlation coefficient}$ ).

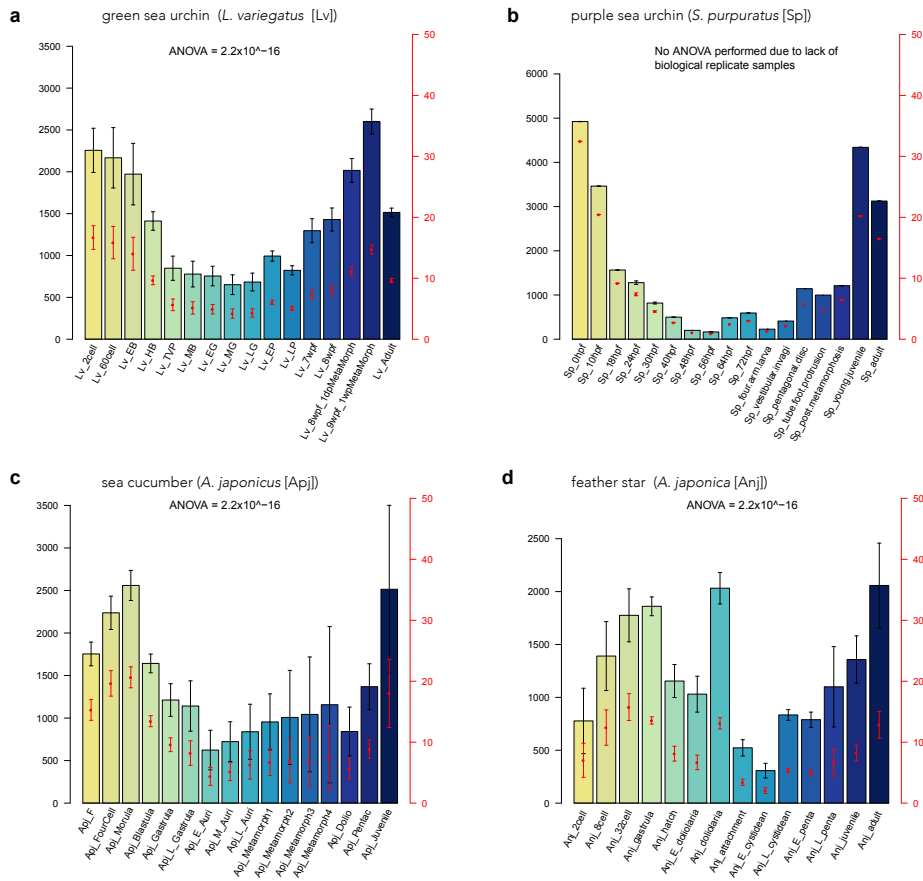

**Supplementary Figure 20 Stage specific genes during echinoderm embryogenesis**

Numbers of stage-specific genes were defined by tau index ( $\tau > 0.5$ ). Relative ratio of the stage-specific genes over the total numbers of expressed ( $> 1$ tpm) genes at each stage was also calculated (red plots, right axis in red). Error bars in panel a, c and d indicate S.D. of biological replicates calculated with the 100 random combination of expression data (BRI-exp data). The changes of these values along development were statistically significant (ANOVA without equal variance,  $p < 2.2 \times 10^{-16}$ ).



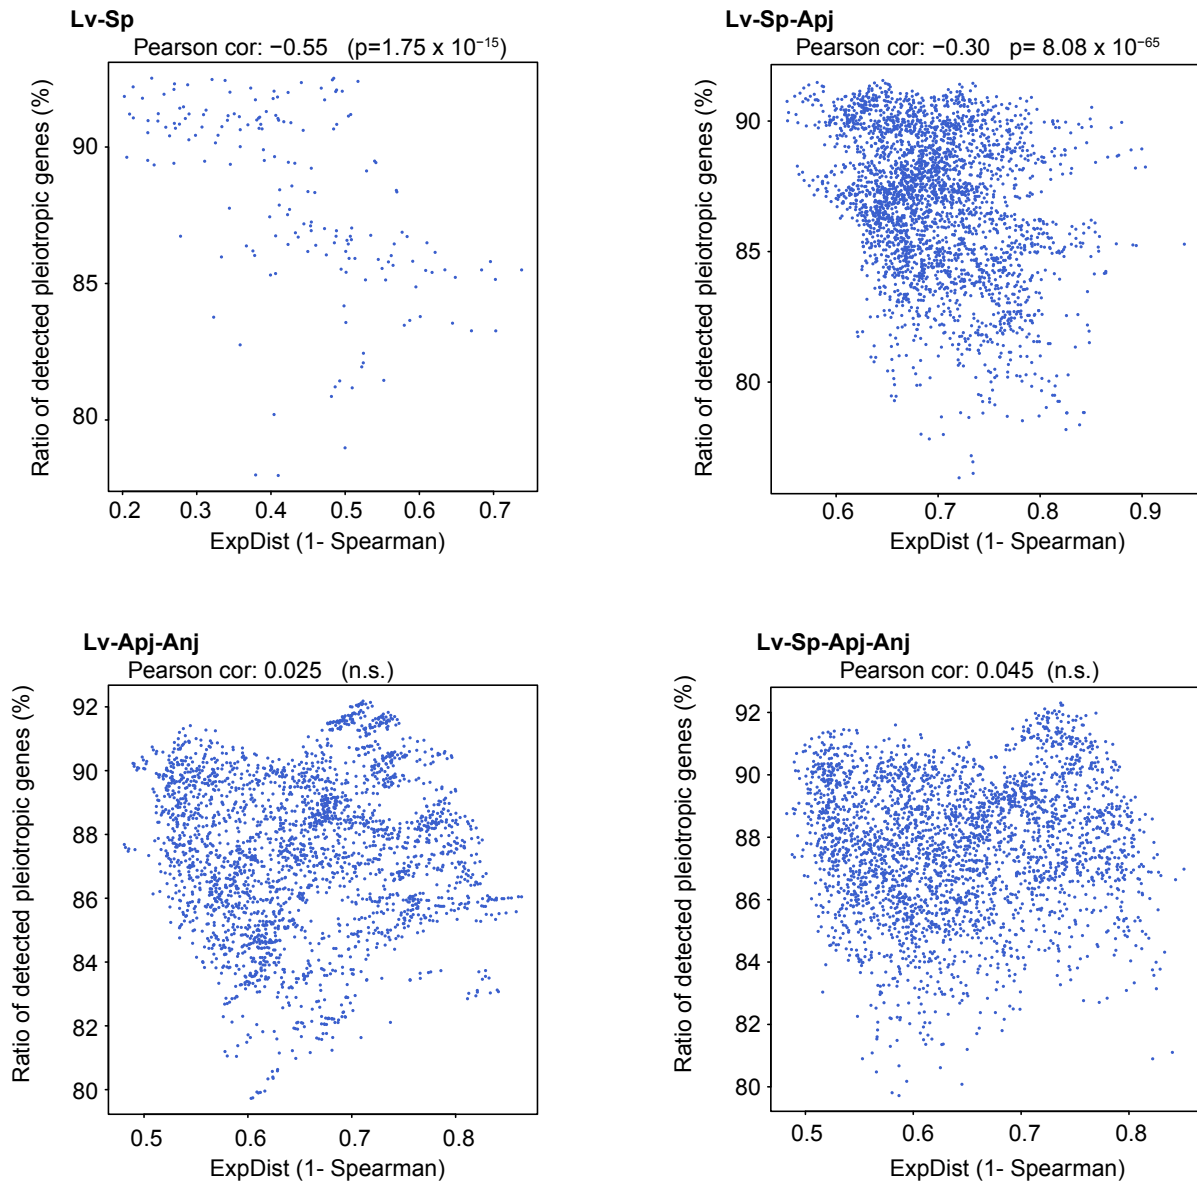

**Supplementary Figure 21 Stages higher ratio of pleiotropic genes tend to be evolutionarily conserved in smaller phylogenetic group**

Relationships between the ratios of pleiotropic genes (defined as genes expressed in more than 50% of staged analyzed, as in Supplementary Figure 20) and transcriptome similarity (expDsit). Each dot represent a combination of stages in the phylogenetic category of interest. For each dot, the average ratio of pleiotropic genes was calculated, and further analyzed for the relationship against their expDists (expDists). Pearson correlation coefficients and p-values (test of no correlation) are shown for each panel. Weak negative correlation was detected for Lv-Sp and Lv-Sp-Apj-Anj but not for clades of larger evolutionary scale (Lv-Apj-Anj and Lv-Sp-Apj-Anj).

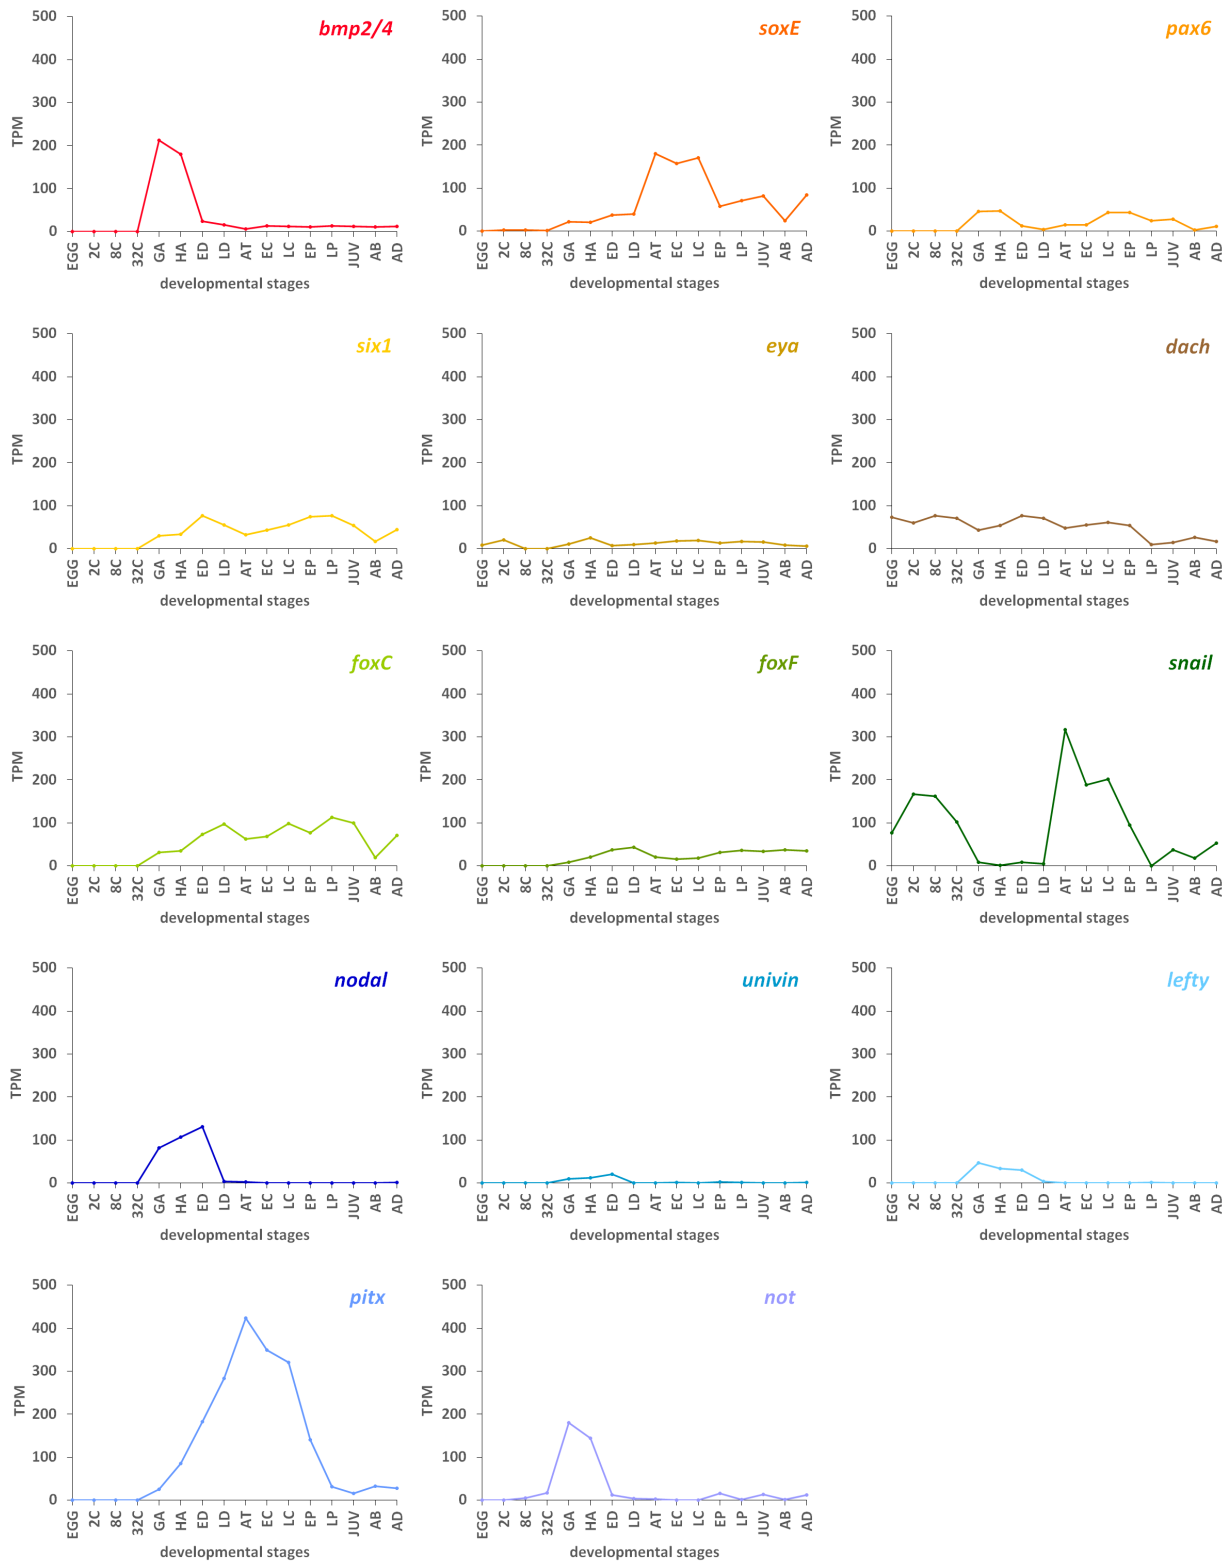

**Supplementary Figure 22. Expression dynamics of left-right patterning and axis-forming genes during the feather star development.**

Temporal expression profiles of the left-right (LR) patterning and axis-forming during *Anneissia japonica* embryogenesis. The horizontal and vertical axes indicate developmental stages and relative expression levels (transcripts per kilobase million, TPM, mean values of two biological replicates), respectively. Error bars are not shown according to the guideline of the journal. Abbreviations of the developmental stages indicates as follows: EGG, unfertilized egg; 2C, two cells stage; 8C, eight cells stage; 32C, 32 cells stage; GA, gastrula; HA, hatching stage; ED, early doliolaria; LD, late doliolaria; AT, attachment stage; EC, early cystidean; LC, late cystidean; EP, early pentacrinoid; LP, late pentacrinoid; JUV, juvenile; AB, arm branching stage; AD, adult. Error bars represent S.D.

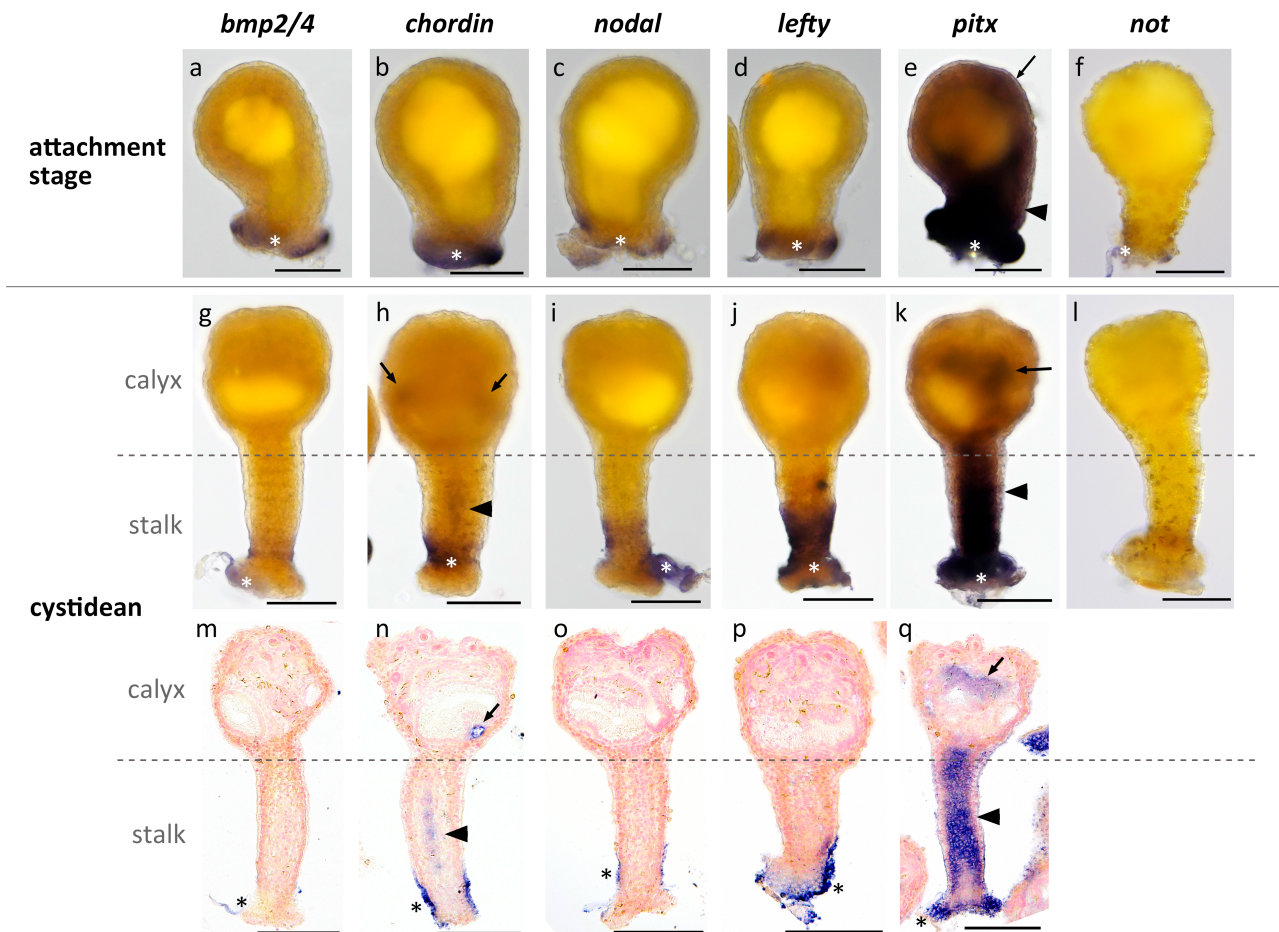

**Supplementary Figure 23. Spatial expression of the left-right patterning and axis-forming in the attached larvae of feather star (*A. japonica*).**

Left-right patterning related and axis-forming genes were analyzed for their expression patterns by WISH experiments. Shown are expression of *bmp2/4* (a, g, m), *chordin* (b, h, n), *nodal* (c, l, o), *lefty* (d, j, p), *pitx* (e, k, q), and *not* (f, l) in larvae at the attachment stage (4 days after fertilization) (a-f) and at the cystidean stage (6 days after fertilization) (g-q). Lateral views are shown for a-l. m-q are the sections of WISH samples. In the attachment stage, *pitx* was expressed in the inner tissue of the calyx (an arrow in e) and the forming stalk (an arrowhead in e), while no other genes were expressed in these tissues. In the cystidean, *chordin* was expressed in the two spots in the calyx (arrows in h, n) and the inner tissue of the stalk (arrowheads in h, n), and *pitx* was expressed in the tissues around the gut (arrows in k, q) and the inner tissue of the whole stalk (arrowheads in k, q). No other genes were expressed in the calyx. Asterisks on each figure (except l) indicate the staining in the outer layer of basal stalk, which may be caused by the mucus that are secreted around the attachment disk. Scale bars: 100  $\mu$ m.





**Supplementary Figure 25. Alignment of C-type lectin proteins found in the skeletal proteomes of the sea urchin *Strongylocentrotus purpuratus* (SPU), Brittle stars *Ophiocoma wendtii* (Ow) and *Ophothrix spiculata* (Os) and the feather star *Oxymocanthus japonicas* (Oj).**

## Supplementary Tables

| Library type         | Library name | Insert length | Read length (bp) | Sequencing strategy | Data (Gb) | Sequencing depth (X) |
|----------------------|--------------|---------------|------------------|---------------------|-----------|----------------------|
| Short insert library | Lv-1         | 394 bp        | 150              | PE150               | 71.1      | 74.7                 |
|                      | Lv-2         | 424 bp        | 150              | PE150               | 43.2      | 45.4                 |
|                      | Lv-3         | 479 bp        | 150              | PE150               | 42.6      | 44.7                 |
|                      | Lv-4         | 496 bp        | 150              | PE150               | 75.8      | 79.6                 |
|                      | Lv-5         | 522 bp        | 150              | PE150               | 13.5      | 14.2                 |
| Long insert library  | Lv-6         | 2-5 K         | 150              | PE150               | 24.2      | 25.4                 |
|                      | Lv-7         | 5-9 K         | 150              | PE150               | 43.7      | 45.9                 |
|                      | Lv-8         | 9-14 K        | 150              | PE150               | 37.1      | 39.0                 |
|                      | Lv-9         | 14-18 K       | 150              | PE150               | 29.7      | 31.2                 |
| Total                |              |               |                  |                     | 380.9     | 400.1                |

**Supplementary Table 1. Paired-end DNA libraries sequenced for green sea urchin assembly.**

Sequencing depths were calculated for high-quality clean data based on genome size (952 Mb for sea urchin). The basic statistics were performed on cleaned sequencing data.

| Library type         | Library name | Insert length | Read length (bp) | Sequencing strategy | Data (G) | Sequencing depth (X) |
|----------------------|--------------|---------------|------------------|---------------------|----------|----------------------|
| Short insert library | Anj-1        | 277 bp        | 150              | PE150               | 32.7     | 59.1                 |
|                      | Anj-2        | 324 bp        | 150              | PE150               | 26.9     | 48.6                 |
|                      | Anj-3        | 381 bp        | 150              | PE150               | 14.4     | 26.0                 |
|                      | Anj-4        | 450 bp        | 150              | PE150               | 24.2     | 43.8                 |
|                      | Anj-5        | 450 bp        | 250              | PE250               | 36.7     | 66.4                 |
|                      | Anj-6        | 477 bp        | 150              | PE150               | 18.8     | 34.0                 |
|                      | Anj-7        | 2-5 Kb        | 150              | PE150               | 6.2      | 11.2                 |
| Long insert library  | Anj-8        | 5-9 Kb        | 150              | PE150               | 9.9      | 17.9                 |
|                      | Anj-9        | 14-18 Kb      | 150              | PE150               | 11.0     | 19.9                 |
|                      | Anj-10       | 2.5 Kb        | 45-80            | PE150               | 19.6     | 35.4                 |
|                      | Anj-11       | 3.6 Kb        | 45-80            | PE150               | 7.8      | 14.1                 |
|                      | Anj-12       | 4.7 Kb        | 45-80            | PE150               | 6.1      | 11.0                 |
| Total                |              |               |                  |                     | 214.3    | 387.5                |

**Supplementary Table 2. Paired-end DNA libraries sequenced for feather star genome assembly.**

Sequencing depths were calculated for high-quality clean data based on genome size (553Mb for feather star). The basic statistics were performed on cleaned sequencing data.

|                        | Contig    |        | Scaffold  |        |
|------------------------|-----------|--------|-----------|--------|
|                        | Size (bp) | Number | Size (bp) | Number |
| N90                    | 1,723     | 95,713 | 2,020     | 21,723 |
| N80                    | 3,903     | 60,286 | 24,482    | 2,201  |
| N70                    | 6,452     | 42,583 | 235,147   | 881    |
| N60                    | 8,984     | 30,763 | 434,435   | 582    |
| N50                    | 11,683    | 21,960 | 628,067   | 397    |
| Max length (bp)        | 291126    |        | 4073095   |        |
| Total size (bp)        | 901645781 |        | 973880027 |        |
| Total number (>100bp)  | 195320    |        | 113370    |        |
| Total number (>2000bp) | 86229     |        | 22255     |        |

**Supplementary Table 3. Basic statistics of the assembled green sea urchin genome.**

|                        | Contig    |             | Scaffold  |             |
|------------------------|-----------|-------------|-----------|-------------|
|                        | Size (bp) | Number      | Size (bp) | Number      |
| N90                    | 1,478     | 48,708      | 1,805     | 9,910       |
| N80                    | 4,505     | 26,019      | 67,678    | 989         |
| N70                    | 8,618     | 17,091      | 231,513   | 528         |
| N60                    | 12,948    | 11,747      | 419,248   | 343         |
| N50                    | 18,075    | 8,045       | 623,489   | 228         |
| Max length (bp)        |           | 198,797     |           | 5,844,021   |
| Total size (bp)        |           | 565,829,874 |           | 589,638,548 |
| Total number (>100bp)  |           | 119,876     |           | 76,733      |
| Total number (>2000bp) |           | 40,222      |           | 8,330       |

**Supplementary Table 4. Basic statistics of the assembled feather star genome.**

|                        | Contig    |               | Scaffold  |               |
|------------------------|-----------|---------------|-----------|---------------|
|                        | Size (bp) | Number        | Size (bp) | Number        |
| N90                    | 1,651     | 355,751       | 19,599    | 38,746        |
| N80                    | 2,768     | 253,412       | 32,996    | 28,075        |
| N70                    | 3,873     | 186,181       | 45,744    | 20,984        |
| N60                    | 5,082     | 136,373       | 58,599    | 15,651        |
| N50                    | 6,474     | 97,791        | 72,780    | 11,418        |
| Max length (bp)        |           | 81,520        |           | 778,843       |
| Total size (bp)        |           | 2,210,140,678 |           | 2,764,315,159 |
| Total number (>100bp)  |           | 644,795       |           | 75,696        |
| Total number (>2000bp) |           | 317,571       |           | 70,280        |

**Supplementary Table 5 Basic statistics of the brittle star genome obtained from Echinobase<sup>65-67</sup>.**

| Library        | Description                         | Gene number | Coverage |
|----------------|-------------------------------------|-------------|----------|
| eukaryota_odb9 | Complete BUSCOs (C)                 | 270         | 89.1 %   |
|                | Complete and single-copy BUSCOs (S) | 248         | 81.8 %   |
|                | Complete and duplicated BUSCOs (D)  | 22          | 7.3 %    |
|                | Fragmented BUSCOs (F)               | 14          | 4.6 %    |
|                | Missing BUSCOs (M)                  | 19          | 6.3 %    |
|                | Total BUSCO groups searched         | 303         | -        |
| metazoa_odb9   | Complete BUSCOs (C)                 | 882         | 90.2 %   |
|                | Complete and single-copy BUSCOs (S) | 815         | 83.3 %   |
|                | Complete and duplicated BUSCOs (D)  | 67          | 6.9 %    |
|                | Fragmented BUSCOs (F)               | 50          | 5.1 %    |
|                | Missing BUSCOs (M)                  | 46          | 4.7 %    |
|                | Total BUSCO groups                  | 978         | -        |

**Supplementary Table 6 Coverage rate of conserved genes in assembled green sea urchin genome by BUSCO.**



| Library                                       | Description                         | Gene number | Coverage |
|-----------------------------------------------|-------------------------------------|-------------|----------|
| Eukaryote-conserved genes<br>(eukaryota_odb9) | Complete BUSCOs (C)                 | 282         | 93.0 %   |
|                                               | Complete and single-copy BUSCOs (S) | 274         | 90.4 %   |
|                                               | Complete and duplicated BUSCOs (D)  | 8           | 2.6 %    |
|                                               | Fragmented BUSCOs (F)               | 8           | 2.6 %    |
|                                               | Missing BUSCOs (M)                  | 13          | 4.4 %    |
|                                               | Total BUSCO groups searched         | 303         | -        |
| Metazoa-conserved genes<br>(metazoa_odb9)     | Complete BUSCOs (C)                 | 916         | 93.6 %   |
|                                               | Complete and single-copy BUSCOs (S) | 906         | 92.6 %   |
|                                               | Complete and duplicated BUSCOs (D)  | 10          | 1.0 %    |
|                                               | Fragmented BUSCOs (F)               | 23          | 2.4 %    |
|                                               | Missing BUSCOs (M)                  | 39          | 4.0 %    |
|                                               | Total BUSCO groups searched         | 978         | -        |

**Supplementary Table 7 Coverage rate of conserved genes in assembled feather star genome by BUSCO**

| Library                                       | Description                         | Gene number | Coverage |
|-----------------------------------------------|-------------------------------------|-------------|----------|
| Eukaryote-conserved genes<br>(eukaryota_odb9) | Complete BUSCOs (C)                 | 303         | 87.8 %   |
|                                               | Complete and single-copy BUSCOs (S) | 175         | 57.8 %   |
|                                               | Complete and duplicated BUSCOs (D)  | 91          | 30.0 %   |
|                                               | Fragmented BUSCOs (F)               | 17          | 5.6 %    |
|                                               | Missing BUSCOs (M)                  | 20          | 6.6 %    |
|                                               | Total BUSCO groups searched         | 303         | -        |
| Metazoa-conserved genes<br>(metazoa_odb9)     | Complete BUSCOs (C)                 | 901         | 92.1 %   |
|                                               | Complete and single-copy BUSCOs (S) | 597         | 61.0 %   |
|                                               | Complete and duplicated BUSCOs (D)  | 304         | 31.1 %   |
|                                               | Fragmented BUSCOs (F)               | 36          | 3.7 %    |
|                                               | Missing BUSCOs (M)                  | 41          | 4.2 %    |
|                                               | Total BUSCO groups searched         | 978         | -        |

**Supplementary Table 8 Coverage rate of conserved genes in brittle star genome by BUSCO.**

| Species      | Total reads   | Mapped reads  | Reads map (%) |
|--------------|---------------|---------------|---------------|
| Feather star | 838,964,826   | 782,414,226   | 93.26         |
| Sea urchin   | 1,367,973,887 | 1,360,681,865 | 99.47         |

**Supplementary Table 9 Statistics of the mapping ratio of RNAseq reads in two assembled genomes.**

| Statistical item | Length (bp) | Number  |
|------------------|-------------|---------|
| N90              | 426         | --      |
| N80              | 711         | --      |
| N70              | 1,097       | --      |
| N60              | 1,568       | --      |
| N50              | 2,091       | --      |
| Average length   | 1,116       | --      |
| Max length       | 31,011      | --      |
| Total length     | 873,673,625 | --      |
| Total number     | --          | 782,334 |
| Number>=1000bp   | --          | 250,683 |

**Supplementary Table 10 Statistics of feather star transcripts assembled by Trinity and clustered by TGICL.**

| Statistical item     | Length (bp) | Number  |
|----------------------|-------------|---------|
| N90                  | 499         | --      |
| N80                  | 818         | --      |
| N70                  | 1,181       | --      |
| N60                  | 1,601       | --      |
| N50                  | 2,063       | --      |
| Average length       | 1,217       | --      |
| Max length           | 37,771      | --      |
| Total length         | 239,193,964 | --      |
| Total number         | --          | 196,425 |
| Number $\geq$ 1000bp | --          | 74,038  |

**Supplementary Table 11 Statistics of green sea urchin (*Lytechinus variegatus*) transcripts assembled by Trinity and clustered by TGICL.**

| Range of length | Total number | Total match number | Percent (%) | >50% of sequence |            | >90% of sequence |             |
|-----------------|--------------|--------------------|-------------|------------------|------------|------------------|-------------|
|                 |              |                    |             | Number           | Percent(%) | Number           | Percent (%) |
| All             | 453,163      | 447,015            | 98.64       | 430,467          | 94.99      | 320,783          | 70.79       |
| $\geq$ 500      | 227,528      | 225,406            | 99.07       | 217,710          | 95.68      | 162,479          | 71.41       |
| $\geq$ 1000     | 133,684      | 133,342            | 99.74       | 129,325          | 96.74      | 99,388           | 74.35       |

**Supplementary Table 12 Assessment of the completeness of coding region using transcriptome data in the feather star genome.**

| Range of length (bp) | Total number | Total match number | Percent (%) | >50% of sequence |             | >90% of sequence |             |
|----------------------|--------------|--------------------|-------------|------------------|-------------|------------------|-------------|
|                      |              |                    |             | Number           | Percent (%) | Number           | Percent (%) |
| All                  | 187,965      | 187,078            | 99.53       | 179,153          | 95.31       | 120,108          | 63.90       |
| $\geq$ 500           | 94,870       | 94,551             | 99.66       | 90,635           | 95.54       | 55,675           | 58.69       |
| $\geq$ 1000          | 51,093       | 51,057             | 99.93       | 48,655           | 95.23       | 28,087           | 54.97       |

**Supplementary Table 13 Assessment of the completeness of coding region using transcriptome data in the green sea urchin genome.**

| Type    | Rebase TEs  |             | TE protiens |             | De novo     |             | Combined TEs |             |
|---------|-------------|-------------|-------------|-------------|-------------|-------------|--------------|-------------|
|         | Length (bp) | % in genome | Length (bp) | % in genome | Length (bp) | % in genome | Length (bp)  | % in genome |
| DNA     | 4,329,259   | 0.73        | 2,776,494   | 0.47        | 60,982,279  | 10.34       | 65,802,851   | 11.16       |
| LINE    | 5,273,685   | 0.89        | 20,453,430  | 3.47        | 63,607,826  | 10.79       | 86,507,741   | 14.67       |
| SINE    | 816,335     | 0.14        | 0           | 0           | 18,668,683  | 3.16        | 18,957,279   | 3.22        |
| LTR     | 5,897,757   | 1.00        | 7,628,210   | 1.30        | 77,710,356  | 13.18       | 88,461,182   | 15.00       |
| Other   | 48          | 0.000008    | 0           | 0           | 14,785      | 0.0025      | 14,833       | 0.002       |
| Unknown | 0           | 0           | 0           | 0           | 96,699,545  | 16.40       | 96,699,545   | 16.40       |
| Total   | 15,029,720  | 2.5         | 30,812,054  | 5.2         | 254,273,525 | 43.12       | 288,319,345  | 48.90       |

**Supplementary Table 14 The statistics of transposable element in feather star genome.**

| Type         | Repeat Size | % of genome |
|--------------|-------------|-------------|
| Trf          | 27,484,869  | 4.66        |
| Repeatmasker | 15,029,720  | 2.55        |
| Proteinmask  | 30,812,054  | 5.23        |
| De novo      | 270,515,276 | 45.88       |
| Total        | 313,512,480 | 53.12       |

**Supplementary Table 15 The statistics of repeat sequences annotated by different methods in feather star genome**

| Type    | Rebase TEs  |             | TE protiens |             | De novo     |             | Combined TEs |             |
|---------|-------------|-------------|-------------|-------------|-------------|-------------|--------------|-------------|
|         | Length (Bp) | % in genome | Length (Bp) | % in genome | Length (Bp) | % in genome | Length (Bp)  | % in genome |
| DNA     | 15,726,621  | 1.61        | 2,700,815   | 0.28        | 104,346,168 | 10.71       | 109,578,386  | 11.25       |
| LINE    | 10,611,419  | 1.09        | 24,815,386  | 2.55        | 26,910,567  | 2.76        | 55,762,446   | 5.72        |
| SINE    | 2,822,575   | 0.29        | 0           | 0           | 19,535,922  | 2.01        | 20,452,191   | 2.10        |
| LTR     | 5,661,477   | 0.58        | 5,259,001   | 0.54        | 5,808,334   | 0.60        | 16,180,259   | 1.66        |
| Other   | 2,085       | 0.0002      | 0           | 0           | 0           | 0           | 2,085        | 0.0002      |
| Unknown | 0           | 0           | 0           | 0           | 253,607,055 | 26.04       | 253,607,055  | 26.04       |
| Total   | 33,870,267  | 3.48        | 32,753,565  | 3.36        | 398,826,011 | 40.95       | 437,743,803  | 44.95       |

**Supplementary Table 16** The statistics of transposable element in green sea urchin genome.

| Type         | Repeat Size | % of genome |
|--------------|-------------|-------------|
| Trf          | 41429791    | 4.35        |
| Repeatmasker | 33870267    | 3.48        |
| Proteinmask  | 32753565    | 3.36        |
| De novo      | 403226206   | 41.40       |
| Total        | 456240421   | 46.84       |

**Supplementary Table 17** The statistics of repeat sequences annotated by different methods in green sea urchin genome.

| Species                     | Feather star | Green sea urchin |
|-----------------------------|--------------|------------------|
| Gene number                 | 26,838       | 30,238           |
| Average mRNA length (bp)    | 8,836.90     | 16,134.76        |
| Total number of exon        | 162,961      | 198,447          |
| Average length of exon (bp) | 191.16       | 203.5            |
| Average length of CDS (bp)  | 1,160.73     | 1,335.53         |
| Average number of exon      | 6.07         | 6.56             |
| Total length of intron (bp) | 206,013,032  | 447,499,073      |

**Supplementary Table 18** The statistics of annotated gene set in feather star.

| Database  | Number | Percent (%) |
|-----------|--------|-------------|
| GO        | 17,034 | 63.46       |
| InterPro  | 15,389 | 57.34       |
| COG       | 5,577  | 20.78       |
| KEGG      | 12,146 | 45.25       |
| Nr        | 17,880 | 66.62       |
| SwissProt | 14,097 | 52.52       |
| TrEMBL    | 17,374 | 64.73       |

**Supplementary Table 19** The number of gene models in feather star genome that could be annotated by GO, InterPro, COG, KEGG, Nr (RefSeq non-redundant proteins database), SwissProt and TrEMBL databases.

| Database  | Number | Percent (%) |
|-----------|--------|-------------|
| GO        | 18,042 | 59.66       |
| InterPro  | 16,491 | 54.53       |
| COG       | 6,210  | 20.53       |
| KEGG      | 13,616 | 45.02       |
| Nr        | 20,538 | 67.92       |
| SwissProt | 14,962 | 49.48       |

**Supplementary Table 20** The number of gene models in green sea urchin genome that could be annotated by GO, InterPro, COG, KcGG, Nr, SwissProt and TrEMBL databases.

| Type  | Sub type | Copy (w) | Average length (bp) | Total length (bp) | % of genome |
|-------|----------|----------|---------------------|-------------------|-------------|
| miRNA | -        | 330      | 92.60               | 30,559            | 0.0052      |
| tRNA  | -        | 785      | 73.09               | 57,375            | 0.0097      |
| rRNA  | -        | 365      | 97.33               | 35,524            | 0.0060      |
|       | -        | 150      | 146.74              | 22,011            | 0.0037      |
| snRNA | CD-box   | 32       | 140.31              | 4,490             | 0.0008      |
|       | HACA-box | 3        | 154                 | 462               | 0.00008     |
|       | splicing | 115      | 148.34              | 17,059            | 0.0029      |

**Supplementary Table 21** The statistic result of ncRNAs annotation in feather star genome.

| Type  | Sub type | Copy(w) | Average length (bp) | Total length (bp) | % of genome |
|-------|----------|---------|---------------------|-------------------|-------------|
| miRNA | -        | 595     | 97.84               | 58,213            | 0.0060      |
| tRNA  | -        | 1,131   | 74.45               | 84,206            | 0.0086      |
| rRNA  | -        | 12      | 334.50              | 4,014             | 0.0004      |
|       | -        | 187     | 125.89              | 23,542            | 0.0024      |
| snRNA | Cc-box   | 64      | 101.41              | 6,490             | 0.0007      |
|       | splicing | 123     | 138.63              | 17,052            | 0.0018      |

**Supplementary Table 22** The statistic result of ncRNAs annotation in the green sea urchin genome.

| Species                     | Species name                         | Gene count | Gene family count | Average # of genes per family |
|-----------------------------|--------------------------------------|------------|-------------------|-------------------------------|
| Green sea urchin            | <i>Lytechinus variegatus</i>         | 30,238     | 12,877            | 1.65                          |
| Purple sea urchin           | <i>Strongylocentrotus purpuratus</i> | 27,741     | 13,798            | 1.65                          |
| Sea cucumber ( <i>Apj</i> ) | <i>Apostichopus japonicus</i>        | 21,771     | 10,209            | 1.48                          |
| Brittle star                | <i>Ophiothrix spiculata</i>          | 22,904     | 7,252             | 2.58                          |
| Sea star                    | <i>Acanthaster planci</i>            | 24,323     | 11,522            | 1.63                          |
| Feather star ( <i>Anj</i> ) | <i>Anneissia japonica</i>            | 26,762     | 11,071            | 1.78                          |
| Acorn worm                  | <i>Saccoglossus kowalevskii</i>      | 20,935     | 11,101            | 1.56                          |
| amphioxus                   | <i>Branchiostoma belcheri</i>        | 25,135     | 11,167            | 1.84                          |
| Ciona                       | <i>Ciona intestinalis</i>            | 13,531     | 8,280             | 1.34                          |
| Lamprey                     | <i>Petromyzon marinus</i>            | 10,415     | 6,845             | 1.26                          |
| zebrafish                   | <i>Danio rerio</i>                   | 25,832     | 13,419            | 1.74                          |
| Medaka                      | <i>O. latipes</i>                    | 19,699     | 11,934            | 1.44                          |
| Western clawed frog (frog)  | <i>Xenopus laevis</i>                | 45,099     | 16,428            | 2.18                          |
| chicken                     | <i>Gallus gallus</i>                 | 18,346     | 12,172            | 1.38                          |
| Chinese softshell turtle    | <i>Pelodiscus sinensis</i>           | 18,189     | 12,432            | 1.35                          |
| Mouse                       | <i>Mus musculus</i>                  | 22,808     | 13,389            | 1.55                          |
| Fruit fly                   | <i>Drosophila melanogaster</i>       | 13,918     | 6,979             | 1.49                          |

**Supplementary Table 23** Basic statistics of genes in each species

| Species name                         | Assembly/Gene models made by | Version information                                                      |
|--------------------------------------|------------------------------|--------------------------------------------------------------------------|
| <i>Anolis carolinensis</i>           | Ensembl                      | AnoCar2.0                                                                |
| <i>Branchiostoma belcheri</i>        | LanceletDB                   | v18h27.r3_ref                                                            |
| <i>Ciona intestinalis</i>            | Ensembl                      | GCA_000224145.1                                                          |
| <i>Danio rerio</i>                   | Ensembl                      | GRCz10                                                                   |
| <i>Gallus gallus</i>                 | Ensembl                      | Gallus_gallus-5.0                                                        |
| <i>Strongylocentrotus purpuratus</i> | NCBI                         | GCF_000002235.4                                                          |
| <i>Saccoglossus kowalevskii</i>      | NCBI                         | GCF_000003605.2                                                          |
| <i>Homo sapiens</i>                  | Ensembl                      | GRCh38                                                                   |
| <i>Mus musculus</i>                  | Ensembl                      | GRCm38                                                                   |
| <i>Petromyzon marinus</i>            | Ensembl                      | Pmarinus_7.0                                                             |
| <i>Xenopus tropicalis</i>            | Ensembl                      | JGI_4.2                                                                  |
| <i>Drosophila melanogaster</i>       | Ensembl                      | BDGP6                                                                    |
| <i>Alligator mississippiensis</i>    | NCBI                         | GCF_000281125.3                                                          |
| <i>Ophiothrix spiculata</i>          | Echinobase <sup>65-67</sup>  | PRJNA182997                                                              |
| <i>Apostichopus japonicus</i>        | GigaDB / NCBI                | Jo J <i>et al.</i> <sup>68</sup> and Zhang X <i>et al.</i> <sup>33</sup> |
| <i>Acanthaster planci</i>            | marinegenomics.oist.jp       | cotsv1.0                                                                 |
| <i>Xenopus laevis</i>                | Xenbase                      | Xenla9.1 v1.8.3.2                                                        |

**Supplementary Table 24 Gene set and genomes used in this project.**

| Species                   | Relative branch length |
|---------------------------|------------------------|
| <i>A. japonica (Anj)</i>  | 0.676                  |
| <i>A. planci</i>          | 0.457                  |
| <i>O. spiculata</i>       | 0.720                  |
| <i>L. variegatus</i>      | 0.198                  |
| <i>S. purpuratus</i>      | 0.099                  |
| <i>A. japonicus (Apj)</i> | 0.726                  |
| <i>S. kowalevskii</i>     | 0.603                  |
| <i>P. marinus</i>         | 0.596                  |
| <i>G. gallus</i>          | 0.131                  |
| <i>P. sinensis</i>        | 0.142                  |
| <i>M. musculus</i>        | 0.206                  |
| <i>X. laevis</i>          | 0.245                  |
| <i>D. rerio</i>           | 0.208                  |
| <i>O. latipes</i>         | 0.272                  |
| <i>C. intestinalis</i>    | 1.291                  |
| <i>B. floridae</i>        | 0.619                  |
| <i>D. melanogaster</i>    | 0.849                  |

**Supplementary Table 25 Branch length estimated from orthologous protein sequences using RAxML**

| Outgroup  | Ingroup 1                     | Ingroup 2    | bA       | bB       | delta    | Z score   | CP     |
|-----------|-------------------------------|--------------|----------|----------|----------|-----------|--------|
| Fruit fly | Purple sea urchin             | Feather star | 0.357167 | 0.357832 | 0.000664 | 0.248722  | 18.96% |
| Fruit fly | Sea cucumber                  | Feather star | 0.405544 | 0.338478 | 0.067065 | 20.519726 | 99.96% |
| Fruit fly | Sea star ( <i>A. planci</i> ) | Feather star | 0.325828 | 0.358536 | 0.032708 | 12.516316 | 99.96% |
| Fruit fly | Ciona                         | Feather star | 0.638331 | 0.493120 | 0.145211 | 44.751784 | 99.96% |
| Fruit fly | Frog                          | Feather star | 0.430825 | 0.497370 | 0.066545 | 23.667571 | 99.96% |
| Fruit fly | Mouse                         | Feather star | 0.426553 | 0.503514 | 0.076962 | 27.491514 | 99.96% |
| Fruit fly | Amphioxus                     | Feather star | 0.356322 | 0.434225 | 0.077903 | 29.249280 | 99.96% |
| Fruit fly | Acorn worm                    | Feather star | 0.348458 | 0.401235 | 0.052777 | 19.409783 | 99.96% |
| Fruit fly | Turtle                        | Feather star | 0.438257 | 0.484672 | 0.046415 | 16.226124 | 99.96% |
| Fruit fly | Medaka                        | Feather star | 0.441844 | 0.489073 | 0.047229 | 16.736153 | 99.96% |
| Fruit fly | Zebrafish                     | Feather star | 0.436039 | 0.495892 | 0.059853 | 21.198209 | 99.96% |
| Fruit fly | Chicken                       | Feather star | 0.426225 | 0.491857 | 0.065632 | 23.285712 | 99.96% |
| Fruit fly | Brittle star                  | Feather star | 0.438306 | 0.322925 | 0.115381 | 36.881544 | 99.96% |
| Fruit fly | Lamprey                       | Feather star | 0.468829 | 0.447759 | 0.021071 | 6.902717  | 99.96% |
| Fruit fly | Green sea urchin              | Feather star | 0.434961 | 0.357281 | 0.077681 | 26.119120 | 99.96% |

**Supplementary Table 26 The result of evolutionary rate by LINTRE.**

The outgroup is *Drosophila*, and feather star as the reference. Z-statistic was used to test whether the distances between ingroups (bA, bB) to outgroup is significantly different to 0 or not. Delta is the absolute difference between bA and bB ( $\text{delta} = |bA - bB|$ ). Z-statistics(Z) is  $\text{delta}/\text{standard error}$  ( $Z = \text{delta}/s.e.$ ). CP (confident probability) is equal to  $1 - P\text{-value}$  ( $CP = 1 - p\text{-value}$ ).

| Outgroup  | Ingroup A                     | Ingroup B    | Identical | Ingroup A specific | Ingroup B specific | Chi-score | P-value   |
|-----------|-------------------------------|--------------|-----------|--------------------|--------------------|-----------|-----------|
| Fruit fly | Purple sea urchin             | Feather star | 249278    | 50403              | 50482              | 0.06      | 0.80358   |
| Fruit fly | Sea cucumber                  | Feather star | 163070    | 38339              | 32852              | 422.91    | <0.000001 |
| Fruit fly | Sea star ( <i>A. planci</i> ) | Feather star | 252455    | 46664              | 50569              | 156.83    | <0.000001 |
| Fruit fly | Ciona                         | Feather star | 228412    | 77874              | 61072              | 2031.78   | <0.000001 |
| Fruit fly | Frog                          | Feather star | 256298    | 60342              | 68865              | 562.21    | <0.000001 |
| Fruit fly | Mouse                         | Feather star | 258718    | 60113              | 70056              | 759.50    | <0.000001 |
| Fruit fly | Amphioxus                     | Feather star | 242897    | 50022              | 59741              | 860.57    | <0.000001 |
| Fruit fly | Acorn worm                    | Feather star | 239633    | 48178              | 54403              | 377.76    | <0.000001 |
| Fruit fly | Turtle                        | Feather star | 244650    | 59439              | 65172              | 263.76    | <0.000001 |
| Fruit fly | Medaka                        | Feather star | 247908    | 60186              | 66140              | 280.62    | <0.000001 |
| Fruit fly | Zebrafish                     | Feather star | 253733    | 60393              | 68000              | 450.70    | <0.000001 |
| Fruit fly | Chicken                       | Feather star | 251967    | 59428              | 67747              | 544.18    | <0.000001 |
| Fruit fly | Brittle star                  | Feather star | 193593    | 49011              | 38062              | 1376.78   | <0.000001 |
| Fruit fly | Lamprey                       | Feather star | 201026    | 53043              | 50818              | 47.67     | <0.000001 |
| Fruit fly | Green sea urchin              | Feather star | 231579    | 57268              | 48742              | 685.72    | <0.000001 |

**Supplementary Table 27 The result of evolutionary rate by RRT (Tajima's Relative Rate Test)**

|            | <i>Anj</i> | <i>Ap</i> | <i>Os</i> | <i>Lv</i> | <i>Sp</i> | <i>Apj</i> | <i>Sk</i> | <i>Pm</i> | <i>Gg</i> | <i>Ps</i> | <i>Mm</i> | <i>Xl</i> | <i>Dr</i> | <i>Ol</i> | <i>Ci</i> | <i>Bf</i> | <i>Dm</i> |
|------------|------------|-----------|-----------|-----------|-----------|------------|-----------|-----------|-----------|-----------|-----------|-----------|-----------|-----------|-----------|-----------|-----------|
| <i>Anj</i> | 0.00       | 1.31      | 1.57      | 1.47      | 1.37      | 1.59       | 1.43      | 2.00      | 1.90      | 1.91      | 1.92      | 1.89      | 1.91      | 1.97      | 2.43      | 1.64      | 2.65      |
| <i>Ap</i>  | 1.31       | 0.00      | 1.18      | 1.21      | 1.11      | 1.33       | 1.39      | 1.96      | 1.85      | 1.87      | 1.87      | 1.84      | 1.86      | 1.92      | 2.39      | 1.59      | 2.61      |
| <i>Os</i>  | 1.57       | 1.18      | 0.00      | 1.47      | 1.37      | 1.59       | 1.65      | 2.22      | 2.12      | 2.13      | 2.13      | 2.11      | 2.12      | 2.19      | 2.65      | 1.85      | 2.87      |
| <i>Lv</i>  | 1.47       | 1.21      | 1.47      | 0.00      | 0.30      | 1.33       | 1.56      | 2.12      | 2.02      | 2.03      | 2.04      | 2.01      | 2.03      | 2.09      | 2.55      | 1.76      | 2.77      |
| <i>Sp</i>  | 1.37       | 1.11      | 1.37      | 0.30      | 0.00      | 1.24       | 1.46      | 2.02      | 1.92      | 1.93      | 1.94      | 1.91      | 1.93      | 1.99      | 2.45      | 1.66      | 2.68      |
| <i>Apj</i> | 1.59       | 1.33      | 1.59      | 1.33      | 1.24      | 0.00       | 1.67      | 2.24      | 2.14      | 2.15      | 2.16      | 2.13      | 2.15      | 2.21      | 2.67      | 1.88      | 2.89      |
| <i>Sk</i>  | 1.43       | 1.39      | 1.65      | 1.56      | 1.46      | 1.67       | 0.00      | 1.77      | 1.67      | 1.68      | 1.69      | 1.66      | 1.68      | 1.74      | 2.20      | 1.41      | 2.42      |
| <i>Pm</i>  | 2.00       | 1.96      | 2.22      | 2.12      | 2.02      | 2.24       | 1.77      | 0.00      | 1.09      | 1.10      | 1.11      | 1.08      | 1.10      | 1.16      | 2.15      | 1.60      | 2.74      |
| <i>Gg</i>  | 1.90       | 1.85      | 2.12      | 2.02      | 1.92      | 2.14       | 1.67      | 1.09      | 0.00      | 0.27      | 0.40      | 0.50      | 0.69      | 0.75      | 2.05      | 1.50      | 2.64      |
| <i>Ps</i>  | 1.91       | 1.87      | 2.13      | 2.03      | 1.93      | 2.15       | 1.68      | 1.10      | 0.27      | 0.00      | 0.41      | 0.51      | 0.70      | 0.76      | 2.06      | 1.51      | 2.65      |
| <i>Mm</i>  | 1.92       | 1.87      | 2.13      | 2.04      | 1.94      | 2.16       | 1.69      | 1.11      | 0.40      | 0.41      | 0.00      | 0.52      | 0.70      | 0.77      | 2.07      | 1.52      | 2.66      |
| <i>Xl</i>  | 1.89       | 1.84      | 2.11      | 2.01      | 1.91      | 2.13       | 1.66      | 1.08      | 0.50      | 0.51      | 0.52      | 0.00      | 0.68      | 0.74      | 2.04      | 1.49      | 2.63      |
| <i>Dr</i>  | 1.91       | 1.86      | 2.12      | 2.03      | 1.93      | 2.15       | 1.68      | 1.10      | 0.69      | 0.70      | 0.70      | 0.68      | 0.00      | 0.48      | 2.06      | 1.51      | 2.65      |
| <i>Ol</i>  | 1.97       | 1.92      | 2.19      | 2.09      | 1.99      | 2.21       | 1.74      | 1.16      | 0.75      | 0.76      | 0.77      | 0.74      | 0.48      | 0.00      | 2.12      | 1.57      | 2.71      |
| <i>Ci</i>  | 2.43       | 2.39      | 2.65      | 2.55      | 2.45      | 2.67       | 2.20      | 2.15      | 2.05      | 2.06      | 2.07      | 2.04      | 2.06      | 2.12      | 0.00      | 2.03      | 3.17      |
| <i>Bf</i>  | 1.64       | 1.59      | 1.85      | 1.76      | 1.66      | 1.88       | 1.41      | 1.60      | 1.50      | 1.51      | 1.52      | 1.49      | 1.51      | 1.57      | 2.03      | 0.00      | 2.38      |
| <i>Dm</i>  | 2.65       | 2.61      | 2.87      | 2.77      | 2.68      | 2.89       | 2.42      | 2.74      | 2.64      | 2.65      | 2.66      | 2.63      | 2.65      | 2.71      | 3.17      | 2.38      | 0.00      |

**Supplementary Table 28** The result of evolutionary rate by APE.

| Gene ID                              | KO ID  | Name                | Definition                                               |
|--------------------------------------|--------|---------------------|----------------------------------------------------------|
| scaffold288031_len342695_cov171.5    | K09511 | DNAJB5              | DnaJ homolog subfamily B member 5                        |
| scaffold287712_len2945570_cov188.9   | K10397 | KIF6_9              | kinesin family member 6/9                                |
| scaffold287714_len2871179_cov188.42  | K03130 | TAIF5               | transcription initiation factor TFIID subunit 5          |
| scaffold2707_len876726_cov182.13     | K12571 | PAN2                | PAB-dependent poly(A)-specific ribonuclease subunit 2    |
| scaffold287743_len2803612_cov181.129 | K01958 | PC, pyc             | pyruvate carboxylase                                     |
| scaffold32248_len650992_cov182.16    | K12812 | UAP56, BAT1, SUB2   | ATP-dependent RNA helicase UAP56/SUB2                    |
| scaffold287717_len1600092_cov198.49  | K12197 | CHMP1, VPS46, DID2  | charged multivesicular body protein 1                    |
| scaffold522_len1101056_cov227.41     | K10134 | EI24                | etoposide-induced 2.4 mRNA                               |
| scaffold287938_len408866_cov212.4    | K08469 | GPR158              | G protein-coupled receptor 158                           |
| scaffold287861_len940595_cov192.24   | K00924 | E2.7.1.-            | kinase                                                   |
| scaffold7731_len1735946_cov199.45    | K02209 | MCM5, CDC46         | DNA replication licensing factor MCM5                    |
| scaffold1483_len710385_cov172.5      | K08857 | NEK1_4_5            | NIMA (never in mitosis gene a)-related kinase 1/4/5      |
| scaffold288275_len480233_cov166.13   | K04601 | CELSR2              | cadherin EGF LAG seven-pass G-type receptor 2            |
| scaffold2030_len652032_cov178.10     | K03251 | EIF3D               | translation initiation factor 3 subunit D                |
| scaffold287715_len1027211_cov185.10  | K04560 | STX1A               | syntaxin 1A                                              |
| scaffold1489_len2284818_cov182.8     | K10364 | CAPZA               | capping protein (actin filament) muscle Z-line, alpha    |
| scaffold287949_len505691_cov196.9    | K10733 | GINS2, PSF2         | GINS complex subunit 2                                   |
| scaffold11779_len1430905_cov172.34   | K12035 | TRIM71              | tripartite motif-containing protein 71                   |
| scaffold284860_len1800451_cov186.35  | K08332 | VAC8                | vacuolar protein 8                                       |
| scaffold685_len2926416_cov193.50     | K12380 | RASA3               | Ras GTPase-activating protein 3                          |
| scaffold288014_len389662_cov180.3    | K12606 | RCD1, CNOT9, CAF40  | CCR4-NOT transcription complex subunit 9                 |
| scaffold287861_len940595_cov192.15   | K02901 | RP-L27e, RPL27      | large subunit ribosomal protein L27e                     |
| scaffold287835_len3118868_cov185.83  | K09871 | AQP12               | aquaporin-12                                             |
| scaffold287706_len398110_cov188.11   | K07739 | ELP3, KAT9          | elongator complex protein 3                              |
| scaffold287847_len925385_cov155.22   | K11885 | DDI1                | DNA damage-inducible protein 1                           |
| scaffold4054_len1135799_cov195.15    | K12796 | ERBB2IP, ERBIN      | erbB2-interacting protein                                |
| scaffold287704_len1198815_cov201.33  | K10570 | ERCC8, CKN1, CSA    | DNA excision repair protein ERCC-8                       |
| scaffold287754_len4335492_cov202.56  | K12829 | SF3B2, SAPI45, CUS1 | splicing factor 3B subunit 2                             |
| scaffold287868_len458714_cov195.5    | K12392 | APIB1               | AP-1 complex subunit beta-1                              |
| scaffold211_len1577895_cov191.47     | K10151 | CCND2               | G1/S-specific cyclin-D2                                  |
| scaffold287719_len1884721_cov185.57  | K12831 | SF3B4, SAP49        | splicing factor 3B subunit 4                             |
| scaffold288015_len651517_cov191.8    | K04460 | PPP5C               | serine/threonine-protein phosphatase 5                   |
| scaffold288191_len216021_cov166.10   | K02885 | RP-L19e, RPL19      | large subunit ribosomal protein L19e                     |
| scaffold3940_len624931_cov186.12     | K04922 | KCNK13              | potassium channel subfamily K member 13                  |
| scaffold1594_len1068242_cov183.29    | K10380 | ANK                 | ankyrin                                                  |
| scaffold6083_len184754_cov179.6      | K10390 | TUBD                | tubulin delta                                            |
| scaffold275_len1219475_cov178.5      | K10407 | KLC                 | kinesin light chain                                      |
| scaffold287743_len2803612_cov181.22  | K07199 | PRKAB               | 5'-AMP-activated protein kinase, regulatory beta subunit |
| scaffold287736_len1891122_cov214.81  | K00889 | PIP5K               | 1-phosphatidylinositol-4-phosphate 5-kinase              |
| scaffold287909_len199859_cov185.5    | K13216 | PPP1R8, NIPP1       | nuclear inhibitor of protein phosphatase 1               |
| scaffold376_len1572418_cov194.32     | K02989 | RP-S5e, RPS5        | small subunit ribosomal protein S5e                      |
| scaffold234_len1672027_cov178.46     | K08826 | HIPK                | homeodomain interacting protein kinase                   |

|                                        |        |                       |                                                                |
|----------------------------------------|--------|-----------------------|----------------------------------------------------------------|
| scaffold306325_len3074_cov500_single.1 | K13125 | NOSIP                 | nitric oxide synthase-interacting protein                      |
| scaffold737_len1565949_cov176.8        | K08291 | GRK4_5_6              | G protein-coupled receptor kinase                              |
| scaffold287755_len519135_cov135.3      | K11338 | RUVBL2, RVB2, INO80J  | RuvB-like protein 2                                            |
| scaffold211_len1577895_cov191.25       | K02865 | RP-L10Ae, RPL10A      | large subunit ribosomal protein L10Ae                          |
| scaffold3782_len1007564_cov172.50      | K09402 | FOXJ1                 | forkhead box protein J1                                        |
| scaffold3934_len446420_cov169.6        | K14561 | IMP4                  | U3 small nucleolar ribonucleoprotein protein                   |
| scaffold284860_len1800451_cov186.50    | K00599 | METTL6                | methyltransferase-like protein 6                               |
| scaffold2756_len2360902_cov194.74      | K00006 | GPD1                  | glycerol-3-phosphate dehydrogenase (NAD+)                      |
| scaffold352_len1594369_cov220.6        | K10165 | NOD2, CARD15          | nucleotide-binding oligomerization domain-containing protein 2 |
| scaffold287949_len505691_cov196.2      | K05726 | BCAR1, CAS            | breast cancer anti-estrogen resistance 1                       |
| scaffold1826_len1998817_cov189.4       | K10085 | EDEM2                 | ER degradation enhancer, mannosidase alpha-like 2              |
| scaffold288039_len1115542_cov189.4     | K12815 | DHX38, PRP16          | pre-mRNA-splicing factor ATP-dependent RNA helicase            |
| scaffold288221_len503873_cov180.18     | K05305 | FUK                   | fucokinase                                                     |
| scaffold7370_len818893_cov191.42       | K04638 | IFT57, HIPPI, ESRRBL1 | intraflagellar transport protein 57                            |
| scaffold287579_len849171_cov184.46     | K10406 | KIFC2_3               | kinesin family member C2/C3                                    |
| scaffold287711_len853857_cov187.4      | K05862 | VDAC1                 | voltage-dependent anion channel protein 1                      |
| scaffold287990_len610157_cov183.15     | K14163 | EPRS                  | bifunctional glutamyl/prolyl-tRNA synthetase                   |
| scaffold287834_len5846547_cov211.150   | K14021 | BAK, BAK1             | Bcl-2 homologous antagonist/killer                             |
| scaffold522_len1101056_cov227.7        | K11797 | PHIP, WDR11           | PH-interacting protein                                         |
| scaffold352_len1594369_cov220.71       | K09498 | CCT6                  | T-complex protein 1 subunit zeta                               |
| scaffold287540_len12866_cov218.1       | K14717 | SLC39A11, ZIP11       | solute carrier family 39 (zinc transporter), member 11         |
| scaffold483_len1788099_cov177.12       | K01238 | SUN                   | SUN family beta-glucosidase                                    |
| scaffold287769_len469884_cov163.11     | K07561 | DPH1, dph2            | 2-(3-amino-3-carboxypropyl)histidine synthase                  |
| scaffold585_len4108843_cov191.75       | K10631 | TOPORS                | E3 ubiquitin-protein ligase                                    |
| scaffold287790_len634930_cov199.5      | K02908 | RP-L30e, RPL30        | large subunit ribosomal protein L30e                           |
| scaffold1696_len571195_cov180.20       | K14403 | CPSF3, YSH1           | cleavage and polyadenylation specificity factor subunit 3      |

**Supplementary Table 29 KEGG annotations of positively selected genes during echinoderm evolution.**



## References

1. Hyman, L.H. *The Invertebrates: Echinodermata* (Vol. IV), (McGraw-Hill, 1955).
2. Mooi, R., David, B. & Wray, G.A. Arrays in rays: terminal addition in echinoderms and its correlation with gene expression. *Evol Dev* **7**, 542–55 (2005).
3. Rozhnov, S.V. Symmetry of echinoderms: From initial bilaterally-asymmetric metamerism to pentaradiality. *Natural Science* **06**, 171–183 (2014).
4. Reich, A., Dunn, C., Akasaka, K. & Wessel, G. Phylogenomic analyses of Echinodermata support the sister groups of Asterozoa and Echinozoa. *PLoS One* **10**, e0119627 (2015).
5. Telford, M.J. *et al.* Phylogenomic analysis of echinoderm class relationships supports Asterozoa. *Proc Biol Sci* **281**(2014).
6. Janda, L., Damborsky, J., Reznicek, G.A. & Wiche, G. Plectin repeats and modules: strategic cysteines and their presumed impact on cytolinker functions. *Bioessays* **23**, 1064–9 (2001).
7. Cameron, R.A. *et al.* Unusual gene order and organization of the sea urchin hox cluster. *J Exp Zool B Mol Dev Evol* **306**, 45–58 (2006).
8. Baughman, K.W. *et al.* Genomic organization of Hox and ParaHox clusters in the echinoderm, *Acanthaster planci*. *Genesis* **52**, 952–8 (2014).
9. Freeman, R. *et al.* Identical genomic organization of two hemichordate hox clusters. *Curr Biol* **22**, 2053–8 (2012).
10. Szabo, R. & Ferrier, D.E.K. Two more Posterior Hox genes and Hox cluster dispersal in echinoderms. *BMC Evol Biol* **18**, 203 (2018).
11. Duboule, D. Temporal colinearity and the phylotypic progression: a basis for the stability of a vertebrate Bauplan and the evolution of morphologies through heterochrony. *Development*, 135–42 (1994).
12. Irie, N. & Kuratani, S. Comparative transcriptome analysis reveals vertebrate phylotypic period during organogenesis. *Nat Commun* **2**, 248 (2011).
13. Hu, H. *et al.* Constrained vertebrate evolution by pleiotropic genes. *Nat Ecol Evol* **1**, 1722–1730 (2017).
14. Zalts, H. & Yanai, I. Developmental constraints shape the evolution of the nematode mid-developmental transition. *Nat Ecol Evol* **1**, 113 (2017).
15. Kalinka, A.T. *et al.* Gene expression divergence recapitulates the developmental hourglass model. *Nature* **468**, 811–4 (2010).
16. Xu, F. *et al.* High expression of new genes in trochophore enlightening the ontogeny and evolution of trochozoans. *Sci Rep* **6**, 34664 (2016).
17. Raff, A. *The shape of life: genes, development, and the evolution of animal form*, (University of Chicago Press, 1996).
18. Irie, N., Satoh, N. & Kuratani, S. The phylum Vertebrata: a case for zoological recognition. *Zoological Lett* **4**, 32 (2018).
19. Israel, J.W. *et al.* Comparative Developmental Transcriptomics Reveals Rewiring of a Highly Conserved Gene Regulatory Network during a Major Life History Switch in the Sea Urchin Genus *Heliocidaris*. *PLoS Biol* **14**, e1002391 (2016).
20. Malik, A., Gildor, T., Sher, N., Layous, M. & Ben-Tabou de-Leon, S. Parallel embryonic transcriptional programs evolve under distinct constraints and may enable morphological conservation amidst adaptation. *Dev Biol* **430**, 202–213 (2017).
21. Tu, Q., Cameron, R.A. & Davidson, E.H. Quantitative developmental transcriptomes of the sea urchin *Strongylocentrotus purpuratus*. *Dev Biol* **385**, 160–7 (2014).
22. Tu, Q., Cameron, R.A., Worley, K.C., Gibbs, R.A. & Davidson, E.H. Gene structure in the sea urchin *Strongylocentrotus purpuratus* based on transcriptome analysis. *Genome Res* **22**, 2079–87 (2012).
23. Li, Y. *et al.* Weighted gene co-expression network analysis reveals potential genes involved in early metamorphosis process in sea cucumber *Apostichopus japonicus*. *Biochem Biophys Res Commun* **495**, 1395–1402 (2018).

24. Uchida, Y., Uesaka, M., Yamamoto, T., Takeda, H. & Irie, N. Embryonic lethality is not sufficient to explain hourglass-like conservation of vertebrate embryos. *Evodevo* **9**, 7 (2018).
25. Irie, N. Remaining questions related to the hourglass model in vertebrate evolution. *Curr Opin Genet Dev* **45**, 103–107 (2017).
26. Sumrall, C.D. & Wray, G.A. Ontogeny in the fossil record: diversification of body plans and the evolution of “aberrant” symmetry in Paleozoic echinoderms. *Paleobiology* **33**, 149–163 (2007).
27. Molina, M.D., de Croze, N., Haillot, E. & Lepage, T. Nodal: master and commander of the dorsal–ventral and left–right axes in the sea urchin embryo. *Curr Opin Genet Dev* **23**, 445–53 (2013).
28. Su, Y.H. Telling left from right: left–right asymmetric controls in sea urchins. *Genesis* **52**, 269–78 (2014).
29. Bessodes, N. *et al.* Reciprocal signaling between the ectoderm and a mesendodermal left–right organizer directs left–right determination in the sea urchin embryo. *PLoS Genet* **8**, e1003121 (2012).
30. Duboc, V., Rottinger, E., Lapraz, F., Besnardeau, L. & Lepage, T. Left–right asymmetry in the sea urchin embryo is regulated by nodal signaling on the right side. *Dev Cell* **9**, 147–58 (2005).
31. Luo, Y.J. & Su, Y.H. Opposing nodal and BMP signals regulate left–right asymmetry in the sea urchin larva. *PLoS Biol* **10**, e1001402 (2012).
32. Seaver, R.W. & Livingston, B.T. Examination of the skeletal proteome of the brittle star *Ophiocoma wendtii* reveals overall conservation of proteins but variation in spicule matrix proteins. *Proteome Sci* **13**, 7 (2015).
33. Zhang, X. *et al.* The sea cucumber genome provides insights into morphological evolution and visceral regeneration. *PLoS Biol* **15**, e2003790 (2017).
34. Tabari, E. & Su, Z. PorthoMCL: Parallel orthology prediction using MCL for the realm of massive genome availability. *Big Data Analytics* **2:4**(2017).
35. Sumrall, C.D. & Gregory, A.W. Ontogeny in the fossil record: Diversification of body plans and the evolution of “aberrant” symmetry in Paleozoic echinoderms. *Paleobiology* **33**, 149–163 (2007).
36. Mann, K., Wilt, F.H. & Poustka, A.J. Proteomic analysis of sea urchin (*Strongylocentrotus purpuratus*) spicule matrix. *Proteome Sci* **8**, 33 (2010).
37. Mann, K., Poustka, A.J. & Mann, M. In–depth, high–accuracy proteomics of sea urchin tooth organic matrix. *Proteome Sci* **6**, 33 (2008).
38. Mann, K., Poustka, A.J. & Mann, M. The sea urchin (*Strongylocentrotus purpuratus*) test and spine proteomes. *Proteome Sci* **6**, 22 (2008).
39. Flores, R.L. & Livingston, B.T. The skeletal proteome of the sea star *Patiria miniata* and evolution of biomineralization in echinoderms. *BMC Evol Biol* **17**, 125 (2017).
40. Flores, R.L., Gonzales, K., Seaver, R.W. & Livingston, B.T. The skeletal proteome of the brittle star *Ophiothrix spiculata* identifies C–type lectins and other proteins conserved in echinoderm skeleton formation. *AIMS Molecular Science* **3**, 357–367 (2016).
41. Ettensohn, C.A. Horizontal transfer of the *msp130* gene supported the evolution of metazoan biomineralization. *Evol Dev* **16**, 139–48 (2014).
42. Szabo, R and Ferrier, DEK. Another biomineralising protostome with an *msp130* gene and conservation of *msp130* gene structure across Bilateria *Evolution and Development* **17**(3), 195–197. (2015)
43. Livingston, B.T. *et al.* A genome–wide analysis of biomineralization–related proteins in the sea urchin *Strongylocentrotus purpuratus*. *Dev Biol* **300**, 335–48 (2006). Bedell, J.A., Korf, I. & Gish, W. MaskerAid: a performance enhancement to RepeatMasker. *Bioinformatics* **16**, 1040–1 (2000).
44. Benson, G. Tandem repeats finder: a program to analyze DNA sequences. *Nucleic Acids Res* **27**, 573–80 (1999).
45. Price, A.L., Jones, N.C. & Pevzner, P.A. De novo identification of repeat families in large genomes. *Bioinformatics* **21 Suppl 1**, i351–8 (2005).

46. Xu, Z. & Wang, H. LTR\_FINDER: an efficient tool for the prediction of full-length LTR retrotransposons. *Nucleic Acids Res* **35**, W265–8 (2007).
47. Stanke, M. & Waack, S. Gene prediction with a hidden Markov model and a new intron submodel. *Bioinformatics* **19 Suppl 2**, ii215–25 (2003).
48. Burge, C. & Karlin, S. Prediction of complete gene structures in human genomic DNA. *J Mol Biol* **268**, 78–94 (1997).
49. Burge, C.B. & Karlin, S. Finding the genes in genomic DNA. *Curr Opin Struct Biol* **8**, 346–54 (1998).
50. Korf, I. Gene finding in novel genomes. *BMC Bioinformatics* **5**, 59 (2004).
51. Majoros, W.H., Pertea, M. & Salzberg, S.L. TigrScan and GlimmerHMM: two open source ab initio eukaryotic gene-finders. *Bioinformatics* **20**, 2878–9 (2004).
52. Kent, W.J. BLAT—the BLAST-like alignment tool. *Genome Res* **12**, 656–64 (2002).
53. Haas, B.J. *et al.* Automated eukaryotic gene structure annotation using EVIDENCEModeler and the Program to Assemble Spliced Alignments. *Genome Biol* **9**, R7 (2008).
54. Zdobnov, E.M. & Apweiler, R. InterProScan—an integration platform for the signature-recognition methods in InterPro. *Bioinformatics* **17**, 847–8 (2001).
55. Lowe, T.M. & Eddy, S.R. tRNAscan-SE: a program for improved detection of transfer RNA genes in genomic sequence. *Nucleic Acids Res* **25**, 955–64 (1997).
56. Li, L., Stoeckert, C.J., Jr. & Roos, D.S. OrthoMCL: identification of ortholog groups for eukaryotic genomes. *Genome Res* **13**, 2178–89 (2003).
57. Stamatakis, A. RAxML version 8: a tool for phylogenetic analysis and post-analysis of large phylogenies. *Bioinformatics* **30**, 1312–3 (2014).
58. Hogan, J.D.K., J. L.; Luo, L.; Hawkins, D. Y.; Ibn-Salem, J.; Lamba, A.; Schatzberg, D.; Piacentino, M. L.; Zuch, D. T.; Core, A. B.; Blumberg, C.; Timmermann, B.; Grau, J. H.; Speranza, E.; Andrade-Narravo, M. A.; Irie, N.; Poustka, A. J.; Bradham C. A. The Developmental Transcriptome for *Lytechinus variegatus* Exhibits Temporally Punctuated Gene Expression Changes. *Development* **460**, Issue 2, 139–154 (2020).
59. Summers, M.M., Messing, C.G. & Rouse, G.W. Phylogeny of Comatulidae (Echinodermata: Crinoidea: Comatulida): a new classification and an assessment of morphological characters for crinoid taxonomy. *Mol Phylogenet Evol* **80**, 319–39 (2014).
60. Kim, D., Langmead, B. & Salzberg, S.L. HISAT: a fast spliced aligner with low memory requirements. *Nat Methods* **12**, 357–60 (2015).
61. Pertea, M., Kim, D., Pertea, G.M., Leek, J.T. & Salzberg, S.L. Transcript-level expression analysis of RNA-seq experiments with HISAT, StringTie and Ballgown. *Nat Protoc* **11**, 1650–67 (2016).
62. Dunn, C.W., Zapata, F., Munro, C., Siebert, S. & Hejnal, A. Pairwise comparisons across species are problematic when analyzing functional genomic data. *Proc Natl Acad Sci U S A* **115**, E409–E417 (2018).
63. Omori, A., Akasaka, K., Kurokawa, D. & Amemiya, S. Gene expression analysis of Six3, Pax6, and Otx in the early development of the stalked crinoid *Metacrinus rotundus*. *Gene Expr Patterns* **11**, 48–56 (2011).
64. Dong, Y. *et al.* Sequencing and automated whole-genome optical mapping of the genome of a domestic goat (*Capra hircus*). *Nat Biotechnol* **31**, 135–41 (2013).
65. Jurka, J. *et al.* Repbase Update, a database of eukaryotic repetitive elements. *Cytogenetic and genome research* **110**, 462–7 (2005).
66. Kudtarkar, P. & Cameron, R.A. Echinobase: an expanding resource for echinoderm genomic information. *Database (Oxford)* **2017**(2017).
67. Cameron, R.A., Samanta, M., Yuan, A., He, D. & Davidson, E. SpBase: the sea urchin genome database and web site. *Nucleic Acids Res* **37**, D750–4 (2009).
68. Jo, J. *et al.* Draft genome of the sea cucumber *Apostichopus japonicus* and genetic polymorphism among color variants. *Gigascience* **6**, 1–6 (2017).
