# Supplementary material for: Genomic insights of body plan transitions from bilateral to pentameral symmetry in Echinoderms
Source: PubMed Central journal article supplement (PMC7351957; doi:10.1038/s42003-020-1091-1), 2020-07-10
Supplement: 42003_2020_1091_MOESM2_ESM.pdf [file 42003_2020_1091_MOESM2_ESM.pdf]

## Description of Additional Supplementary Files

---

**Supplementary Data 1.** Source data for Figure 2a.

**Supplementary Data 2.** Source data for Figure 3b.
