# Supplementary material for: Genomic insights of body plan transitions from bilateral to pentameral symmetry in Echinoderms
Source: PubMed Central journal article supplement (PMC7351957; doi:10.1038/s42003-020-1091-1), 2020-07-10
Supplement: 42003_2020_1091_MOESM5_ESM.pdf [file 42003_2020_1091_MOESM5_ESM.pdf]

## Reporting Summary

Nature Research wishes to improve the reproducibility of the work that we publish. This form provides structure for consistency and transparency in reporting. For further information on Nature Research policies, see [Authors & Referees](#) and the [Editorial Policy Checklist](#).

### Statistics

For all statistical analyses, confirm that the following items are present in the figure legend, table legend, main text, or Methods section.

n/a Confirmed

- The exact sample size ( $n$ ) for each experimental group/condition, given as a discrete number and unit of measurement
- A statement on whether measurements were taken from distinct samples or whether the same sample was measured repeatedly
- The statistical test(s) used AND whether they are one- or two-sided  
*Only common tests should be described solely by name; describe more complex techniques in the Methods section.*
- A description of all covariates tested
- A description of any assumptions or corrections, such as tests of normality and adjustment for multiple comparisons
- A full description of the statistical parameters including central tendency (e.g. means) or other basic estimates (e.g. regression coefficient) AND variation (e.g. standard deviation) or associated estimates of uncertainty (e.g. confidence intervals)
- For null hypothesis testing, the test statistic (e.g.  $F$ ,  $t$ ,  $r$ ) with confidence intervals, effect sizes, degrees of freedom and  $P$  value noted  
*Give  $P$  values as exact values whenever suitable.*
- For Bayesian analysis, information on the choice of priors and Markov chain Monte Carlo settings
- For hierarchical and complex designs, identification of the appropriate level for tests and full reporting of outcomes
- Estimates of effect sizes (e.g. Cohen's  $d$ , Pearson's  $r$ ), indicating how they were calculated

*Our web collection on [statistics for biologists](#) contains articles on many of the points above.*

### Software and code

Policy information about [availability of computer code](#)

Data collection

Illumina HiSeq 4000 platform

Data analysis

SOAPec (v2.03), GapCloser (v1.10), BUSCO (v2.0), Trinity (v2.2.0), Tandem Repeat Finder 41 (v4.04), RepeatMasker42 (open-4-0-5), RepeatModeler (v1.0.4), RepeatScout43 (version 1.0.5), LTR\_FINDER44 (v1.0.5), rebase (RepBase16.02), Augustus45 (v2.5.5), GENSCAN46,47 (v1.0), GlimmerHMM49 (v3.02), EVIDENCEModeler (EVM, ver. 1.1), InterProScan (v4.8), blastp (v2.2.26), tRNAscan-SE 53 (v1.3), BLASTN (v2.2.26), INFERNAL software (v0.81), InterProScan52 (v4.5), INFERNAL software (v0.81), perl (v5.18.4), HISAT2 program (ver. 2.05), StringTie (ver. 1.3.5), R (3.6.1), MCMCtree (v4.4), platanus assemble (v1.2.3), BWA (v0.7.12), SAMtools (v1.3.1), TGICL (version: linux), BLAT (v34), SNAP (v2006-07-28), PASA (v2012-06-25), orthoMCL (v2.0.9), RAXML (v8.2.3), LINTRE (only one version available), CAFE (v3.1)

For manuscripts utilizing custom algorithms or software that are central to the research but not yet described in published literature, software must be made available to editors/reviewers. We strongly encourage code deposition in a community repository (e.g. GitHub). See the Nature Research [guidelines for submitting code & software](#) for further information.

### Data

Policy information about [availability of data](#)

All manuscripts must include a [data availability statement](#). This statement should provide the following information, where applicable:

- Accession codes, unique identifiers, or web links for publicly available datasets
- A list of figures that have associated raw data
- A description of any restrictions on data availability

Brittle star genome (PRJNA182997), feather star genome (PRJNA553656), green sea urchin genome (PRJNA553643), green sea urchin RNAseq data (PRJNA554218), feather star RNAseq data (PRJNA553591), and Japanese sea cucumber RNAseq data (PRJNA553613). Cloned sequences of Hox genes of the feather star (hox1 LC462021, hox2 LC462022, hox4 LC462023, hox5 LC462024, hox7 LC462025, hox8 LC462026, hox9/10 LC462027, hox11/13a LC462028, hox11/13c LC462029) are available through NCBI database. Assembled genomes and gene sets can also be available through DRYAD database (<https://datadryad.org>).

## Field-specific reporting

Please select the one below that is the best fit for your research. If you are not sure, read the appropriate sections before making your selection.

Life sciences     Behavioural & social sciences     Ecological, evolutionary & environmental sciences

For a reference copy of the document with all sections, see [nature.com/documents/nr-reporting-summary-flat.pdf](https://www.nature.com/documents/nr-reporting-summary-flat.pdf)

## Ecological, evolutionary & environmental sciences study design

All studies must disclose on these points even when the disclosure is negative.

|                          |                                                                                                                                                                                                                                                                                                                                                                      |
|--------------------------|----------------------------------------------------------------------------------------------------------------------------------------------------------------------------------------------------------------------------------------------------------------------------------------------------------------------------------------------------------------------|
| Study description        | Descriptive. Genomic and transcriptomic sequencing of echinoderm species (green sea urchin, feather star). Detection of gene expression by in situ hybridization. Proteome analysis.                                                                                                                                                                                 |
| Research sample          | Single individual was used for each species (for genome sequencing).<br>Pooled individuals used for whole embryonic transcriptome data, with biological replicates for each stage. Biological replicates were collected from different parents to represent general population for each species. Further details are provided in the supplementary information file. |
| Sampling strategy        | Single individual from Sagami Bay (Japanese feather star, Japanese sea cucumber), Reeftopia in Florida (Green sea urchin).<br>Random sampling for embryos (gender mixed). Further details are provided in the supplementary information file.                                                                                                                        |
| Data collection          | Whole genome shotgun sequencing, and massively parallel sequencing by Illumina Hiseq 400 platform. Further details are provided in the supplementary information file.                                                                                                                                                                                               |
| Timing and spatial scale | Sample collections started 2015 October, and ended in 2017. During this period, embryonic samples were collected in the breeding seasons for species, and sequencing were done in early 2017.                                                                                                                                                                        |
| Data exclusions          | No data were excluded.                                                                                                                                                                                                                                                                                                                                               |
| Reproducibility          | All the experimental, and bioinformatics analyses were reproducible.                                                                                                                                                                                                                                                                                                 |
| Randomization            | For embryonic samples, samples were categorized by developmental stages defined by morphological features.                                                                                                                                                                                                                                                           |
| Blinding                 | No blindings were used in this study, except for developmental transcriptome data. Transcriptome data were analyzed blindly by a graduate student and performed some analyses, however, developmental stages were evident (easy to estimate) from the relationships of gene expression profiles between samples.                                                     |

Did the study involve field work?     Yes     No

## Reporting for specific materials, systems and methods

We require information from authors about some types of materials, experimental systems and methods used in many studies. Here, indicate whether each material, system or method listed is relevant to your study. If you are not sure if a list item applies to your research, read the appropriate section before selecting a response.

| Materials & experimental systems    |                                                                 | Methods                             |                                                 |
|-------------------------------------|-----------------------------------------------------------------|-------------------------------------|-------------------------------------------------|
| n/a                                 | Involved in the study                                           | n/a                                 | Involved in the study                           |
| <input checked="" type="checkbox"/> | <input type="checkbox"/> Antibodies                             | <input checked="" type="checkbox"/> | <input type="checkbox"/> ChIP-seq               |
| <input checked="" type="checkbox"/> | <input type="checkbox"/> Eukaryotic cell lines                  | <input checked="" type="checkbox"/> | <input type="checkbox"/> Flow cytometry         |
| <input checked="" type="checkbox"/> | <input type="checkbox"/> Palaeontology                          | <input checked="" type="checkbox"/> | <input type="checkbox"/> MRI-based neuroimaging |
| <input type="checkbox"/>            | <input checked="" type="checkbox"/> Animals and other organisms |                                     |                                                 |
| <input checked="" type="checkbox"/> | <input type="checkbox"/> Human research participants            |                                     |                                                 |
| <input checked="" type="checkbox"/> | <input type="checkbox"/> Clinical data                          |                                     |                                                 |

## Animals and other organisms

Policy information about [studies involving animals](#); [ARRIVE guidelines](#) recommended for reporting animal research

|                    |                                                                                                                                                                                                                                                                                            |
|--------------------|--------------------------------------------------------------------------------------------------------------------------------------------------------------------------------------------------------------------------------------------------------------------------------------------|
| Laboratory animals | All the animals were collected from the wild.                                                                                                                                                                                                                                              |
| Wild animals       | Green sea urchin ( <i>Lytechinus variegatus</i> ): Adult green sea urchins obtained from Reeftopia in Florida (FL) or from the Duke Marine lab in Beaufort NC.<br>Japanese feather star ( <i>Anneissia japonica</i> ): in the cove of Koajiro, Sagami Bay (Misaki, Japan) by scuba diving. |

Sea cucumber (*Apostichopus japonicus*): collected from a subtidal sandy benthic environment in Koajiro, Misaki, Sagami Bay (Japan).

Field-collected samples

Fertilized eggs were kept in sea water with room temperature.

Ethics oversight

Animal care and experimental procedures and were conducted in strict accordance with guidelines approved by the Animal Experiments Committee of University of Tokyo (approval ID: 14-03, 16-2). All efforts were made to minimize suffering. Individual animals and embryos were selected blindly from wild types.

Note that full information on the approval of the study protocol must also be provided in the manuscript.
