# Supplementary material for: Genomic insights of body plan transitions from bilateral to pentameral symmetry in Echinoderms
Source: Commun Biol. 2020 Jul 10;3:371. doi: 10.1038/s42003-020-1091-1 (PMC7351957; doi:10.1038/s42003-020-1091-1)
Supplement: Supplementary file 4 — Supplementary Data 2 [file 42003_2020_1091_MOESM4_ESM.xlsx]

## Sheet: Fig3a
	S. purpuratus	P. miniata	O. japonicus	O. spiculata
Clectin/Spicule matrix	11	0	3	4
Ig domain	7	1	22	3
MSP130	5	0	1	0
Metalloprotease	9	2	7	6
Fibrinogen domain	2	2	5	4
LDL-receptor-like	1	3	3	4
EGF domains	5	2	7	5
Alpha2-macroglobulin	2	5	2	2
Semaphorin domain	5	2	5	4
VWA	1	0	1	2
Fras-related ECM	2	1	2	1
IRRE protein	2	0	2	0
VWC	0	5	2	2
Leucine-rich repeat	3	0	3	0
Scavenger receptor domain	5	7	4	2
Cub domain	1	1	2	3
Carbonic anhydrase	2	1	2	2
